# Supplementary material for: Design, synthesis, insecticidal activity, and mechanism of novel diamide derivatives containing acylthiourea targeting insect ryanodine receptors
Source: Royal Society of Chemistry journal article supplement (doi:10.1039/d4nj05000b), 2025-01-01
Supplement: d4nj05000b1.pdf [file d4nj05000b1.pdf]

# Supplementary Information

## Design, Synthesis, Insecticidal Activity, and Mechanism of Novel Diamide Derivatives Containing Acylthiourea Targeting Insect Ryanodine Receptors

Jinmin Peng<sup>a</sup>, Yangyang Zhao<sup>d</sup>, Weibin Xie<sup>a</sup>, Peizhuo Li<sup>b</sup>, Yue Chen<sup>a</sup>,  
Jieyin Liu<sup>a</sup>, Zhiguang Yuchi<sup>b</sup>, Jingbo Liu<sup>C\*</sup>, Yuxin Li<sup>a\*</sup>

\* Correspondence to: Jingbo Liu, College of Horticulture and Landscape Architecture, Tianjin Agricultural University, Tianjin 300384, China, E-mail: [liujingbo0626@163.com](mailto:liujingbo0626@163.com); Yuxin Li, State Key Laboratory of Elemento-Organic Chemistry, Department of Chemistry, Nankai University, Tianjin, China, E-mail: [liy128@nankai.edu.cn](mailto:liy128@nankai.edu.cn);

<sup>a</sup>State Key Laboratory of Elemento-Organic Chemistry, Department of Chemistry, Nankai University, 94 Weijin Road, Tianjin, 300071, China

<sup>b</sup>Tianjin University, Tianjin Key Laboratory for Modern Drug Delivery and High-Efficiency, Collaborative Innovation Center of Chemical Science and Engineering, School of Pharmaceutical Science and Technology, Tianjin University, Tianjin, 30000, China

<sup>c</sup>College of Horticulture and Landscape Architecture, Tianjin Agricultural University, Tianjin 300384, China

<sup>d</sup>National Engineering Research Center of Pesticide, Nankai University, Tianjin 300071, China

## Content

|                                                                                                                                                                |    |
|----------------------------------------------------------------------------------------------------------------------------------------------------------------|----|
| 1. Chemical structures of the title compounds I-1~17 and II-1~13 .....                                                                                         | 3  |
| 2. The results of a virtual screen of 30 compounds with the wild-type <i>Spodoptera frugiperda</i> RyR. ....                                                   | 4  |
| 3. Chemical structures, yields, and <sup>1</sup> H NMR data of the intermediates .....                                                                         | 6  |
| 3.1 Chemical structures, yields, and <sup>1</sup> H NMR data of the intermediates 3a~i .....                                                                   | 6  |
| 3.2 Chemical structure, yield, and <sup>1</sup> H NMR data of the intermediate 3j .....                                                                        | 8  |
| 3.3 Chemical structures, yields, and <sup>1</sup> H NMR data of the intermediates 5a~c, 6a~c, 7a~f, and 8a~f .....                                             | 9  |
| 4. Chemical structures, yields and <sup>1</sup> H NMR, <sup>13</sup> C NMR, <sup>19</sup> F NMR, and HRMS data of the title compounds I-1~17 and II-1~13 ..... | 15 |
| 5. <sup>1</sup> H NMR, <sup>13</sup> C NMR, and <sup>19</sup> F NMR spectrum of some title compounds I-1~17 and II-1~13 .....                                  | 31 |
| 6. The original data of the LC <sub>50</sub> value of CHL's insecticidal activity against <i>P. xylostella</i> .....                                           | 44 |

# 1. Chemical structures of the title compounds I-1~17 and II-1~13

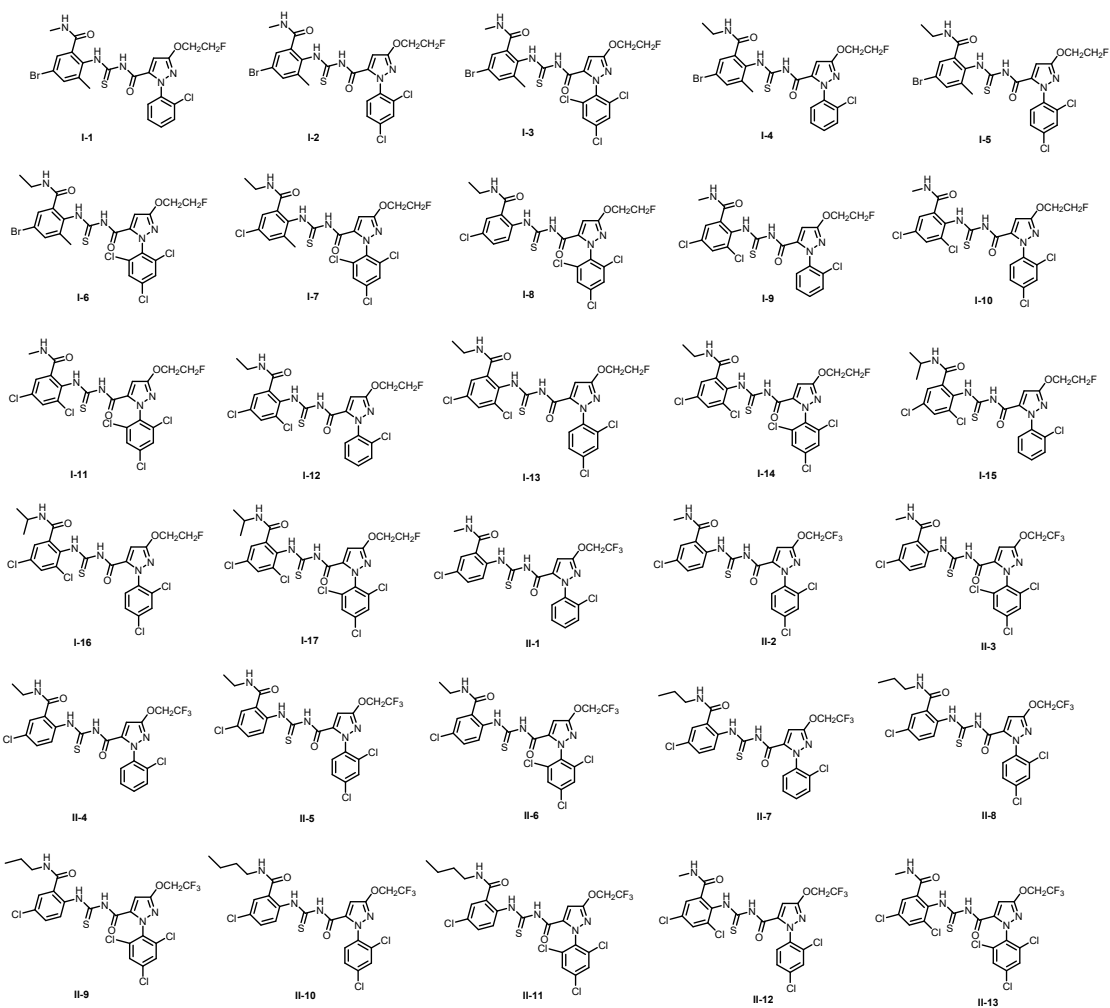

**2.The results of a virtual screen of 30 compounds with the wild-type *Spodoptera frugiperda* RyR.**

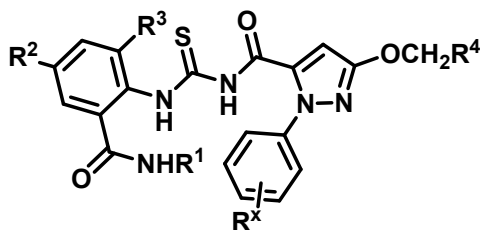

| Compd. | R <sup>1</sup> | R <sup>2</sup> | R <sup>3</sup> | R <sup>4</sup>    | R <sup>x</sup> | Binding Energy (Kcal/mol) |
|--------|----------------|----------------|----------------|-------------------|----------------|---------------------------|
| I-1    | Me             | Br             | Me             | CH <sub>2</sub> F | 2-Cl           | -8.4                      |
| I-2    | Me             | Br             | Me             | CH <sub>2</sub> F | 2,4-diCl       | -8.5                      |
| I-3    | Me             | Br             | Me             | CH <sub>2</sub> F | 2,4,6-triCl    | -7.9                      |
| I-4    | Et             | Br             | Me             | CH <sub>2</sub> F | 2-Cl           | -8.3                      |
| I-5    | Et             | Br             | Me             | CH <sub>2</sub> F | 2,4-diCl       | -8.2                      |
| I-6    | Et             | Br             | Me             | CH <sub>2</sub> F | 2,4,6-triCl    | -7.8                      |
| I-7    | Et             | Cl             | Me             | CH <sub>2</sub> F | 2,4,6-triCl    | -7.8                      |
| I-8    | Et             | Cl             | H              | CH <sub>2</sub> F | 2,4,6-triCl    | -9.4                      |

|             |             |    |    |                   |                      |       |
|-------------|-------------|----|----|-------------------|----------------------|-------|
| <b>I-9</b>  | Me          | Cl | Cl | CH <sub>2</sub> F | 2-Cl                 | -8.2  |
| <b>I-10</b> | Me          | Cl | Cl | CH <sub>2</sub> F | 2,4- <i>di</i> Cl    | -8.1  |
| <b>I-11</b> | Me          | Cl | Cl | CH <sub>2</sub> F | 2,4,6- <i>tri</i> Cl | -8.2  |
| <b>I-12</b> | Et          | Cl | Cl | CH <sub>2</sub> F | 2-Cl                 | -8.2  |
| <b>I-13</b> | Et          | Cl | Cl | CH <sub>2</sub> F | 2,4- <i>di</i> Cl    | -8.1  |
| <b>I-14</b> | Et          | Cl | Cl | CH <sub>2</sub> F | 2,4,6- <i>tri</i> Cl | -8.2  |
| <b>I-15</b> | <i>i</i> Pr | Cl | Cl | CH <sub>2</sub> F | 2-Cl                 | -8.2  |
| <b>I-16</b> | <i>i</i> Pr | Cl | Cl | CH <sub>2</sub> F | 2,4- <i>di</i> Cl    | -8.2  |
| <b>I-17</b> | <i>i</i> Pr | Cl | Cl | CH <sub>2</sub> F | 2,4,6- <i>tri</i> Cl | -8.4  |
| <b>II-1</b> | Me          | Cl | H  | CF <sub>3</sub>   | 2-Cl                 | -9.9  |
| <b>II-2</b> | Me          | Cl | H  | CF <sub>3</sub>   | 2,4- <i>di</i> Cl    | -10.0 |
| <b>II-3</b> | Me          | Cl | H  | CF <sub>3</sub>   | 2,4,6- <i>tri</i> Cl | -10.0 |
| <b>II-4</b> | Et          | Cl | H  | CF <sub>3</sub>   | 2-Cl                 | -9.8  |

|              |                 |    |    |                 |                      |       |
|--------------|-----------------|----|----|-----------------|----------------------|-------|
| <b>II-5</b>  | Et              | Cl | H  | CF <sub>3</sub> | 2,4- <i>di</i> Cl    | -8.9  |
| <b>II-6</b>  | Et              | Cl | H  | CF <sub>3</sub> | 2,4,6- <i>tri</i> Cl | -9.9  |
| <b>II-7</b>  | <sup>n</sup> Pr | Cl | H  | CF <sub>3</sub> | 2-Cl                 | -9.7  |
| <b>II-8</b>  | <sup>n</sup> Pr | Cl | H  | CF <sub>3</sub> | 2,4- <i>di</i> Cl    | -10.0 |
| <b>II-9</b>  | <sup>n</sup> Pr | Cl | H  | CF <sub>3</sub> | 2,4,6- <i>tri</i> Cl | -10.0 |
| <b>II-10</b> | <sup>n</sup> Bu | Cl | H  | CF <sub>3</sub> | 2,4- <i>di</i> Cl    | -10.0 |
| <b>II-11</b> | <sup>n</sup> Bu | Cl | H  | CF <sub>3</sub> | 2,4,6- <i>tri</i> Cl | -10.0 |
| <b>II-12</b> | Me              | Cl | Cl | CF <sub>3</sub> | 2,4- <i>di</i> Cl    | -8.4  |
| <b>II-13</b> | Me              | Cl | Cl | CF <sub>3</sub> | 2,4,6- <i>tri</i> Cl | -8.8  |

### 3. Chemical structures, yields, and <sup>1</sup>H NMR data of the intermediates

#### 3.1 Chemical structures, yields, and <sup>1</sup>H NMR data of the intermediates

##### 3a~i

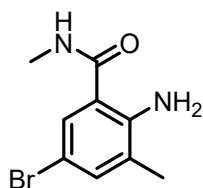

2-amino-5-bromo-*N*,3-dimethylbenzamide(3a, yield: 80%)

**<sup>1</sup>H NMR** (400 MHz, DMSO-*d*<sub>6</sub>) δ 8.32 (s, 1H, -CONH-), 7.50 (d, *J* = 2.2 Hz, 1H, Ph-H), 7.23 (d, *J* = 1.8 Hz, 1H, Ph-H), 6.37 (s, 2H, Ph-NH<sub>2</sub>), 2.71 (d, *J* = 4.5 Hz, 3H, Ph-CH<sub>3</sub>), 2.07 (s, 3H, -NHCH<sub>3</sub>).

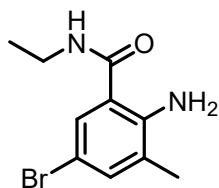

**2-amino-5-bromo-N-ethyl-3-methylbenzamide(3b, yield: 79%)**

**<sup>1</sup>H NMR** (400 MHz, DMSO-*d*<sub>6</sub>) δ 8.34 (s, 1H, -CONH-), 7.51 (s, 1H, Ph-H), 7.23 (s, 1H, Ph-H), 6.34 (s, 2H, Ph-NH<sub>2</sub>), 3.22 (p, *J* = 7.0 Hz, 2H, -CH<sub>2</sub>CH<sub>3</sub>), 2.07 (s, 3H, Ph-CH<sub>3</sub>), 1.09 (t, *J* = 7.2 Hz, 3H, -CH<sub>2</sub>CH<sub>3</sub>).

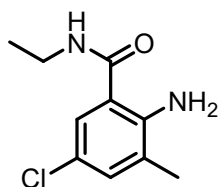

**2-amino-5-chloro-N-ethyl-3-methylbenzamide(3c, yield: 76%)**

**<sup>1</sup>H NMR** (400 MHz, Chloroform-*d*) δ 7.16 (d, *J* = 2.0 Hz, 1H, Ph-H), 7.09 (d, *J* = 2.0 Hz, 1H, Ph-H), 6.01 (s, 2H, Ph-NH<sub>2</sub>), 3.48 – 3.39 (m, 2H, -CH<sub>2</sub>CH<sub>3</sub>), 2.13 (s, 3H, Ph-CH<sub>3</sub>), 1.23 (t, *J* = 7.3 Hz, 3H, -CH<sub>2</sub>CH<sub>3</sub>).

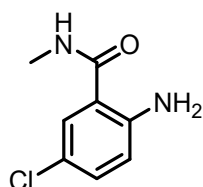

**2-amino-5-chloro-N-methylbenzamide(3d, yield: 83%)**

**<sup>1</sup>H NMR** (400 MHz, DMSO-*d*<sub>6</sub>) δ 8.32 – 8.25 (m, 1H, -CONH-), 7.50 (d, *J* = 2.4 Hz, 1H, Ph-H), 7.15 (dd, *J* = 8.8, 2.4 Hz, 1H, Ph-H), 6.71 (d, *J* = 8.8 Hz, 1H, Ph-H), 6.53 (s, 2H, Ph-NH<sub>2</sub>), 2.71 (d, *J* = 4.5 Hz, 3H, -NHCH<sub>3</sub>).

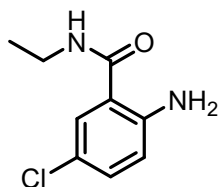

**2-amino-5-chloro-N-ethylbenzamide(3e, yield: 78%)**

**<sup>1</sup>H NMR** (400 MHz, DMSO-*d*<sub>6</sub>) δ 8.33 (s, 1H, -CONH-), 7.53 (s, 1H, Ph-H), 7.14 (d, *J* = 7.8 Hz, 1H, Ph-H), 6.72 (d, *J* = 8.6 Hz, 1H, Ph-H), 6.53 (s, 2H, Ph-NH<sub>2</sub>), 3.29 – 3.17 (m, 2H, -CH<sub>2</sub>CH<sub>3</sub>), 1.10 (t, *J* = 6.8 Hz, 3H, -CH<sub>2</sub>CH<sub>3</sub>).

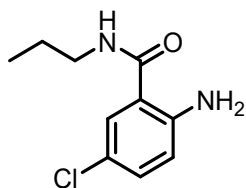

**2-amino-5-chloro-N-propylbenzamide(3f, yield: 77%)**

**<sup>1</sup>H NMR** (400 MHz, DMSO-*d*<sub>6</sub>) δ 8.32 (t, *J* = 5.1 Hz, 1H, -CONH-), 7.52 (d, *J* = 2.4 Hz, 1H, Ph-H), 7.14 (dd, *J* = 8.8, 2.4 Hz, 1H, Ph-H), 6.70 (d, *J* = 8.8 Hz, 1H, Ph-H), 6.50 (s, 2H, Ph-NH<sub>2</sub>), 3.15 (q, *J* = 6.8 Hz, 2H, -CH<sub>2</sub>CH<sub>2</sub>CH<sub>3</sub>), 1.50 (h, *J* = 7.4 Hz, 2H, -CH<sub>2</sub>CH<sub>2</sub>CH<sub>3</sub>), 0.87 (t, *J* = 7.4 Hz, 3H, -CH<sub>2</sub>CH<sub>2</sub>CH<sub>3</sub>).

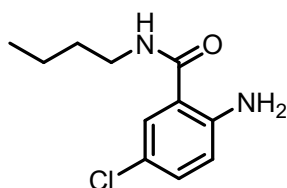

**2-amino-N-butyl-5-chlorobenzamide(3g, yield: 80%)**

**<sup>1</sup>H NMR** (400 MHz, DMSO-*d*<sub>6</sub>) δ 8.30 (t, *J* = 5.2 Hz, 1H, -CONH-), 7.51 (d, *J* = 2.5 Hz, 1H, Ph-H), 7.14 (dd, *J* = 8.8, 2.5 Hz, 1H, Ph-H), 6.70 (d, *J* = 8.8 Hz, 1H, Ph-H), 6.51 (s, 2H, Ph-NH<sub>2</sub>), 3.19 (q, *J* = 7.0 Hz, 2H, -CH<sub>2</sub>CH<sub>2</sub>CH<sub>2</sub>CH<sub>3</sub>), 1.48 (p, *J* = 7.2 Hz, 2H, -CH<sub>2</sub>CH<sub>2</sub>CH<sub>2</sub>CH<sub>3</sub>), 1.31 (dq, *J* = 14.3, 7.1 Hz, 2H, -CH<sub>2</sub>CH<sub>2</sub>CH<sub>2</sub>CH<sub>3</sub>), 0.89 (t, *J* = 7.3 Hz, 3H, -CH<sub>2</sub>CH<sub>2</sub>CH<sub>2</sub>CH<sub>3</sub>).

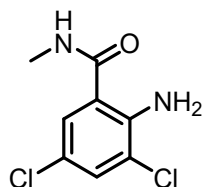

**2-amino-3,5-dichloro-N-methylbenzamide(3h, yield: 77%)**

**<sup>1</sup>H NMR** (400 MHz, DMSO-*d*<sub>6</sub>) δ 8.50 (s, 1H, -CONH-), 7.55 (s, 1H, Ph-H), 7.50 (s, 1H, Ph-H), 6.65 (s, 2H, Ph-NH<sub>2</sub>), 2.74 (d, *J* = 3.3 Hz, 3H, -NHCH<sub>3</sub>).

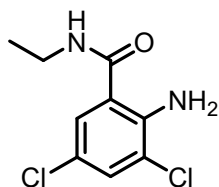

**2-amino-3,5-dichloro-N-ethylbenzamide(3i, yield: 79%)**

**<sup>1</sup>H NMR** (400 MHz, DMSO-*d*<sub>6</sub>) δ 8.53 (s, 1H, -CONH-), 7.56 (d, *J* = 2.3 Hz, 1H, Ph-H), 7.50 (d, *J* = 2.3 Hz, 1H, Ph-H), 6.64 (s, 2H, Ph-NH<sub>2</sub>), 3.29 – 3.18 (m, 2H, -CH<sub>2</sub>CH<sub>3</sub>), 1.10 (t, *J* = 7.2 Hz, 3H, -CH<sub>2</sub>CH<sub>3</sub>).

**3.2 Chemical structure, yield, and <sup>1</sup>H NMR data of the intermediate 3j**



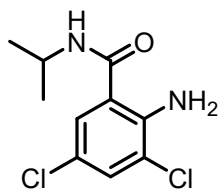

**2-amino-3,5-dichloro-N-isopropylbenzamide(3j, yield: 69%)**

**<sup>1</sup>H NMR** (400 MHz, Chloroform-*d*)  $\delta$  7.33 (d, *J* = 2.2 Hz, 1H, Ph-H), 7.19 (d, *J* = 2.1 Hz, 1H, Ph-H), 5.95 (s, 2H, Ph-NH<sub>2</sub>), 5.81 (s, 1H, -CONH-), 4.21 (dq, *J* = 13.4, 6.6 Hz, 1H, -CH(CH<sub>3</sub>)<sub>2</sub>), 1.25 (d, *J* = 6.5 Hz, 6H, -CH(CH<sub>3</sub>)<sub>2</sub>).

**3.3 Chemical structures, yields, and <sup>1</sup>H NMR data of the intermediates**

**5a~c、6a~c、7a~f, and 8a~f**

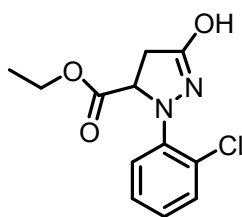

**ethyl 1-(2-chlorophenyl)-3-hydroxy-4,5-dihydro-1H-pyrazole-5-carboxylate(5a, yield: 68%)**

**<sup>1</sup>H NMR** (400 MHz, Chloroform-*d*)  $\delta$  8.67 (s, 1H, 2-Pyrazoline-OH), 7.36 (d, *J* = 7.9 Hz, 1H, Ph-H), 7.15 (d, *J* = 6.9 Hz, 2H, Ph-H), 6.96 (s, 1H, Ph-H), 4.37 – 4.28 (m, 3H, -CH<sub>2</sub>CH<sub>3</sub>, -COCHCH<sub>2</sub>-), 3.04 (dd, *J* = 17.0, 9.8 Hz, 1H, 2-Pyrazoline-H), 2.51 (dd, *J* = 17.0, 3.0 Hz, 1H, 2-Pyrazoline-H), 1.31 (t, 3H, -CH<sub>2</sub>CH<sub>3</sub>).

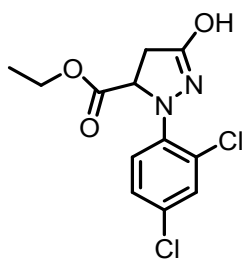

**ethyl 1-(2,4-dichlorophenyl)-3-hydroxy-4,5-dihydro-1H-pyrazole-5-carboxylate(5b, yield: 52%)**

**<sup>1</sup>H NMR** (400 MHz, Chloroform-*d*)  $\delta$  8.90 (s, 1H, 2-Pyrazoline-OH), 7.29 (d, *J* = 8.5 Hz, 1H, Ph-H), 7.15 (s, 1H, Ph-H), 7.13 (s, 1H, Ph-H), 4.34 (q, *J* = 7.1 Hz, 2H, -CH<sub>2</sub>CH<sub>3</sub>), 4.26 (d, *J* = 9.5 Hz, 1H, -COCHCH<sub>2</sub>-), 3.02 (dd, *J* = 17.1, 9.8 Hz, 1H, -2-Pyrazoline-H), 2.52 (d, *J* = 17.1 Hz, 1H, 2-Pyrazoline-H), 1.30 (t, *J* = 7.1 Hz, 3H, -CH<sub>2</sub>CH<sub>3</sub>).

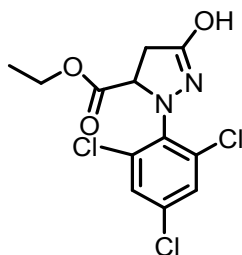

**ethyl 3-hydroxy-1-(2,4,6-trichlorophenyl)-4,5-dihydro-1H-pyrazole-5-carboxylate(5c, yield: 70%)**

**<sup>1</sup>H NMR** (400 MHz, Chloroform-*d*)  $\delta$  8.64 (s, 1H, 2-Pyrazoline-OH), 7.35 (s, 2H, Ph-H), 4.29 – 4.17 (m, 3H, -CH<sub>2</sub>CH<sub>3</sub>, -COCHCH<sub>2</sub>-), 3.21 (dd, *J* = 17.4, 10.8 Hz, 1H, 2-Pyrazoline-H), 2.88 (dd, *J* = 17.3, 4.6 Hz, 1H, 2-Pyrazoline-H), 1.26 (t, *J* = 7.1 Hz, 3H, -OCH<sub>2</sub>CH<sub>3</sub>).

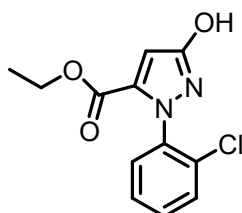

**ethyl 1-(2-chlorophenyl)-3-hydroxy-1H-pyrazole-5-carboxylate(6a, yield: 85%)**

**<sup>1</sup>H NMR** (400 MHz, Chloroform-*d*)  $\delta$  10.93 (s, 1H, Pyrazole-OH), 7.52 – 7.49 (m, 1H, Ph-H), 7.43 (dq, *J* = 7.5, 3.9 Hz, 3H, Ph-H), 6.32 (s, 1H, Pyrazole-H), 4.18 (dd, *J* = 7.1, 2.9 Hz, 2H, -CH<sub>2</sub>CH<sub>3</sub>), 1.17 (t, *J* = 7.1 Hz, 3H, -CH<sub>2</sub>CH<sub>3</sub>).

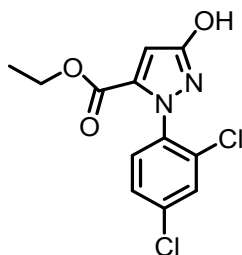

**ethyl 1-(2,4-dichlorophenyl)-3-hydroxy-1H-pyrazole-5-carboxylate(6b, yield: 88%)**

**<sup>1</sup>H NMR** (400 MHz, Chloroform-*d*)  $\delta$  11.00 (s, 1H, Pyrazole-OH), 7.55 – 7.49 (m, 1H, Ph-H), 7.38 (d, *J* = 1.8 Hz, 2H, Ph-H), 6.32 (s, 1H, Pyrazole-H), 4.21 (q, *J* = 7.0 Hz, 2H, -CH<sub>2</sub>CH<sub>3</sub>), 1.22 (t, *J* = 7.1 Hz, 3H, -CH<sub>2</sub>CH<sub>3</sub>).

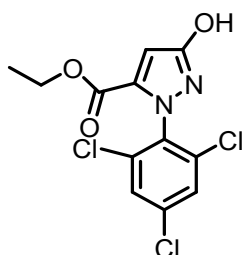

**ethyl 3-hydroxy-1-(2,4,6-trichlorophenyl)-1H-pyrazole-5-carboxylate(6c, yield: 89%)**

**<sup>1</sup>H NMR** (400 MHz, Chloroform-*d*)  $\delta$  10.74 (s, 1H, Pyrazole-OH), 7.47 (s, 2H, Ph-H), 6.37 (s, 1H, Pyrazole-H), 4.22 (q, *J* = 7.1 Hz, 2H, -CH<sub>2</sub>CH<sub>3</sub>), 1.23 (t, *J* = 7.1 Hz, 3H, -CH<sub>2</sub>CH<sub>3</sub>).

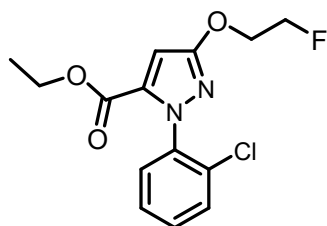

**ethyl 1-(2-chlorophenyl)-3-(2-fluoroethoxy)-1H-pyrazole-5-carboxylate(7a, yield: 73%)**

**<sup>1</sup>H NMR** (400 MHz, Chloroform-*d*)  $\delta$  7.33 (d, *J* = 6.9 Hz, 1H, Ph-H), 7.27 – 7.21 (m, 3H, Ph-H), 6.32 (s, 1H, Pyrazole-H), 4.58 (d, *J* = 47.5 Hz, 2H, -CH<sub>2</sub>CH<sub>2</sub>F), 4.33 (d, *J* = 28.7 Hz, 2H, -CH<sub>2</sub>CH<sub>2</sub>F), 4.04 (q, *J* = 7.0 Hz, 2H, -CH<sub>2</sub>CH<sub>3</sub>), 1.03 (t, *J* = 7.1 Hz, 3H, -CH<sub>2</sub>CH<sub>3</sub>).

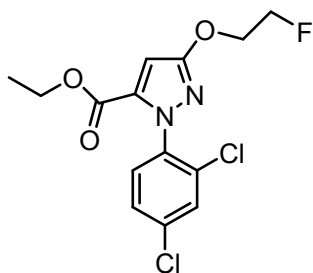

**ethyl 1-(2,4-dichlorophenyl)-3-(2-fluoroethoxy)-1H-pyrazole-5-carboxylate(7b, yield: 71%)**

**<sup>1</sup>H NMR** (400 MHz, Chloroform-*d*)  $\delta$  7.48 (s, 1H, Ph-H), 7.34 (s, 2H, Ph-H), 6.46 (s, 1H, Pyrazole-H), 4.62 (d, *J* = 47.5 Hz, 2H, -CH<sub>2</sub>CH<sub>2</sub>F), 4.37 (d, *J* = 28.7 Hz, 2H, -CH<sub>2</sub>CH<sub>2</sub>F), 4.19 (q, *J* = 7.1 Hz, 2H, -CH<sub>2</sub>CH<sub>3</sub>), 1.21 (t, *J* = 7.1 Hz, 3H, -CH<sub>2</sub>CH<sub>3</sub>).

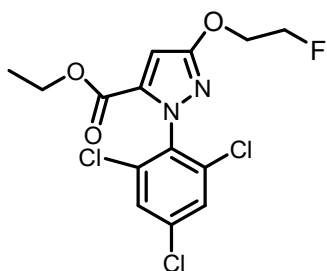

**ethyl 3-(2-fluoroethoxy)-1-(2,4,6-trichlorophenyl)-1H-pyrazole-5-carboxylate(7c, yield: 77%)**

**<sup>1</sup>H NMR** (400 MHz, Chloroform-*d*)  $\delta$  7.26 (s, 2H, Ph-H), 6.31 (s, 1H, Pyrazole-H), 4.60 (t, 1H, -CH<sub>2</sub>CH<sub>2</sub>F), 4.48 (t, 1H, -CH<sub>2</sub>CH<sub>2</sub>F), 4.32 (t, 1H, -CH<sub>2</sub>CH<sub>2</sub>F), 4.25 (t, 1H, -CH<sub>2</sub>CH<sub>2</sub>F), 4.03 (q, *J* = 7.1 Hz, 2H, -CH<sub>2</sub>CH<sub>3</sub>), 1.05 (t, *J* = 7.1 Hz, 3H, -CH<sub>2</sub>CH<sub>3</sub>).

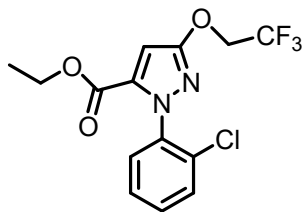

**ethyl 1-(2-chlorophenyl)-3-(2,2,2-trifluoroethoxy)-1H-pyrazole-5-carboxylate (7d, yield: 76%)**

**<sup>1</sup>H NMR** (400 MHz, Chloroform-*d*)  $\delta$  7.33 (d, *J* = 6.9 Hz, 1H, Ph-H), 7.27 – 7.21 (m, 3H, Ph-H), 6.52 (s, 1H, Pyrazole-H), 4.62 (q, *J* = 8.3 Hz, 2H, -CH<sub>2</sub>CF<sub>3</sub>), 4.22 (q, *J* = 7.1 Hz, 2H, -CH<sub>2</sub>CH<sub>3</sub>), 1.23 (t, *J* = 7.1 Hz, 3H, -CH<sub>2</sub>CH<sub>3</sub>).

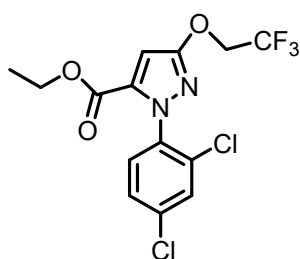

**ethyl 1-(2,4-dichlorophenyl)-3-(2,2,2-trifluoroethoxy)-1H-pyrazole-5-carboxylate (7e, yield: 69%)**

**<sup>1</sup>H NMR** (400 MHz, Chloroform-*d*)  $\delta$  7.53 – 7.47 (m, 1H, Ph-H), 7.36 (d, *J* = 1.7 Hz, 2H, Ph-H), 6.52 (s, 1H, Pyrazole-H), 4.62 (q, *J* = 8.3 Hz, 2H, -CH<sub>2</sub>CF<sub>3</sub>), 4.22 (q, *J* = 7.1 Hz, 2H, -CH<sub>2</sub>CH<sub>3</sub>), 1.23 (t, *J* = 7.1 Hz, 3H, -CH<sub>2</sub>CH<sub>3</sub>).

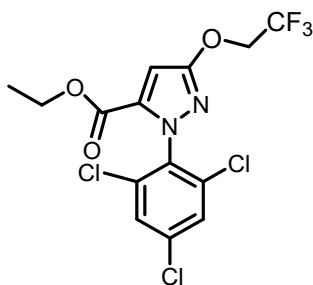

**ethyl 1-(2,4,6-trichlorophenyl)-3-(2,2,2-trifluoroethoxy)-1H-pyrazole-5-carboxylate (7f, yield: 70%)**

**<sup>1</sup>H NMR** (400 MHz, Chloroform-*d*)  $\delta$  7.45 (s, 2H, Ph-H), 6.53 (s, 1H, Pyrazole-H), 4.62 (q, *J* = 8.3 Hz, 2H, -CH<sub>2</sub>CF<sub>3</sub>), 4.23 (q, *J* = 7.1 Hz, 2H, -CH<sub>2</sub>CH<sub>3</sub>), 1.24 (t, *J* = 7.1 Hz, 3H, -CH<sub>2</sub>CH<sub>3</sub>).

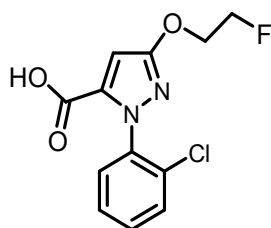

**(2-chlorophenyl)-3-(2-fluoroethoxy)-1H-pyrazole-5-carboxylic acid(8a, yield: 89%)**

**<sup>1</sup>H NMR** (400 MHz, DMSO-*d*<sub>6</sub>) δ 7.60 (d, *J* = 7.5 Hz, 1H, Ph-H), 7.55 – 7.45 (m, 3H, Ph-H), 6.55 (s, 1H, Pyrazole-H), 4.72 (dt, *J* = 47.9, 3.7 Hz, 2H, -CH<sub>2</sub>CH<sub>2</sub>F), 4.37 (dt, *J* = 30.3, 3.6 Hz, 2H, -CH<sub>2</sub>CH<sub>2</sub>F).

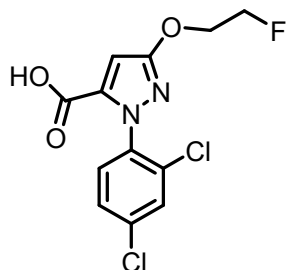

**(2,4-dichlorophenyl)-3-(2-fluoroethoxy)-1H-pyrazole-5-carboxylic acid(8b, yield: 89%)**

**<sup>1</sup>H NMR** (400 MHz, DMSO-*d*<sub>6</sub>) δ 7.82 (d, *J* = 2.0 Hz, 1H, Ph-H), 7.61 – 7.55 (m, 2H, Ph-H), 6.58 (s, 1H, Pyrazole-H), 4.72 (dt, 2H, -CH<sub>2</sub>CH<sub>2</sub>F), 4.37 (dt, 2H, -CH<sub>2</sub>CH<sub>2</sub>F).

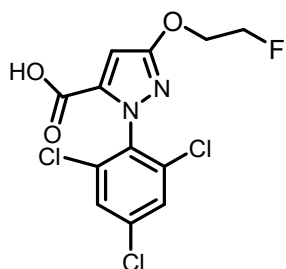

**(2-fluoroethoxy)-1-(2,4,6-trichlorophenyl)-1H-pyrazole-5-carboxylic acid(8c, yield 90%)**

**<sup>1</sup>H NMR** (400 MHz, DMSO-*d*<sub>6</sub>) δ 7.91 (s, 2H, Ph-H), 6.63 (s, 1H, Pyrazole-H), 4.72 (dt, 2H, -CH<sub>2</sub>CH<sub>2</sub>F), 4.37 (dt, 2H, -CH<sub>2</sub>CH<sub>2</sub>F).

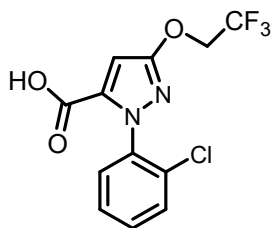

**(2-chlorophenyl)-3-(2,2,2-trifluoroethoxy)-1H-pyrazole-5-carboxylic acid(8d, yield: 91%)**

**<sup>1</sup>H NMR** (400 MHz, DMSO-*d*<sub>6</sub>) δ 7.62 (d, *J* = 7.5 Hz, 1H, Ph-H), 7.55 – 7.46 (m, 3H, Ph-H), 6.69 (s, 1H, Pyrazole-H), 4.87 (q, *J* = 8.8 Hz, 2H, -CH<sub>2</sub>CF<sub>3</sub>).

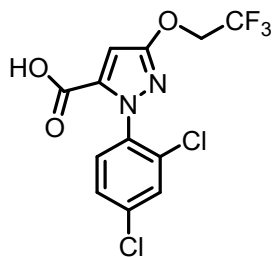

**(2,4-dichlorophenyl)-3-(2,2,2-trifluoroethoxy)-1H-pyrazole-5-carboxylic acid(8e, yield: 89%)**

**<sup>1</sup>H NMR** (400 MHz, DMSO-*d*<sub>6</sub>)  $\delta$  7.84 (d, *J* = 1.8 Hz, 1H, Ph-H), 7.62 – 7.57 (m, 2H, Ph-H), 6.72 (s, 1H, Pyrazole-H), 4.87 (q, *J* = 8.9 Hz, 2H, -CH<sub>2</sub>CF<sub>3</sub>).

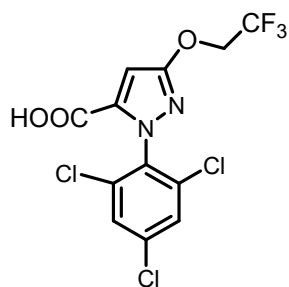

**(2,4,6-trichlorophenyl)-3-(2,2,2-trifluoroethoxy)-1H-pyrazole-5-carboxylic acid(8f, yield: 90%)**

**<sup>1</sup>H NMR** (400 MHz, Acetone-*d*<sub>6</sub>)  $\delta$  9.43 (s, 1H, -COOH), 7.66 (s, 2H, Ph-H), 6.73 (s, 1H, Pyrazole-H), 4.86 (q, *J* = 8.5 Hz, 2H, -CH<sub>2</sub>CF<sub>3</sub>).

**4. Chemical structures, yields, and <sup>1</sup>H NMR, <sup>13</sup>C NMR, <sup>19</sup>F NMR, and HRMS data of the title compounds I-1~17 and II-1~13**

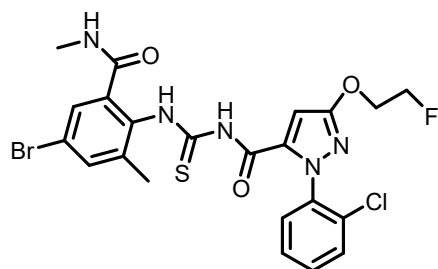

**I-1**

***N*-((4-bromo-2-methyl-6-(methylcarbamoyl)phenyl)carbamothioyl)-1-(2-chlorophenyl)-3-(2-fluoroethoxy)-1H-pyrazole-5-carboxamide(I-1, yield: 29%, melting point: 128-139 °C, white solid)**

**<sup>1</sup>H NMR** (400 MHz, DMSO-*d*<sub>6</sub>) δ 11.76 (s, 1H, -CONHCS-), 11.59 (s, 1H, -Ph-NHCS-), 8.30 (d, *J* = 4.8 Hz, 1H, -CONH-), 7.60 – 7.58 (m, 2H, Ph-H), 7.52 – 7.47 (m, 4H, Ph-H), 7.17 (d, *J* = 4.5 Hz, 1H, Pyrazole-H), 4.75 (d, *J* = 47.8 Hz, 2H, -CH<sub>2</sub>CH<sub>2</sub>F), 4.40 (d, *J* = 30.2 Hz, 2H, -CH<sub>2</sub>CH<sub>2</sub>F), 2.63 (s, 3H, -NHCH<sub>3</sub>), 2.17 (s, 3H, Ph-CH<sub>3</sub>).

**<sup>13</sup>C NMR** (101 MHz, DMSO) δ 180.1, 165.9, 162.2, 158.7, 139.7, 138.5, 134.6, 134.5, 130.9, 130.2, 129.8, 129.8, 128.8, 128.4, 128.1, 120.5, 96.6, 83.2(d), 79.6, 69.0, 26.4, 18.1.

**<sup>19</sup>F NMR** (376 MHz, DMSO-*d*<sub>6</sub>) δ -222.44 – -222.86 (m).

**HRMS** (ESI) Calculated for C<sub>22</sub>H<sub>21</sub>BrClFN<sub>5</sub>O<sub>3</sub>S ([M + H]<sup>+</sup>) = 568.0216, found 568.0211.

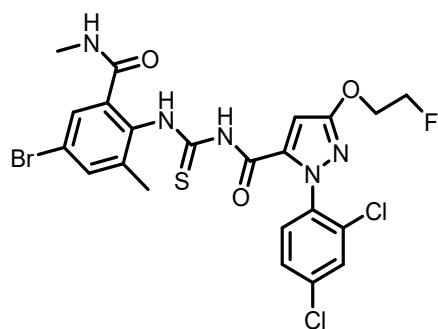

**I-2**

***N*-((4-bromo-2-methyl-6-(methylcarbamoyl)phenyl)carbamothioyl)-1-(2,4-dichlorophenyl)-3-(2-fluoroethoxy)-1H-pyrazole-5-carboxamide(I-2, yield: 30%, melting point: 138-157 °C, white solid)**

**<sup>1</sup>H NMR** (400 MHz, DMSO-*d*<sub>6</sub>) δ 11.77 (s, 1H, -CONHCS-), 11.57 (s, 1H, -Ph-NHCS-), 8.22 (d, *J* = 4.7 Hz, 1H, -CONH-), 7.84 (d, *J* = 2.2 Hz, 1H, Ph-H), 7.66 – 7.58 (m, 3H, Ph-H), 7.45 (d, *J* = 2.1 Hz, 1H, Ph-H), 7.22 (s, 1H, Pyrazole-H), 4.83 – 4.68 (m, 2H, -CH<sub>2</sub>CH<sub>2</sub>F), 4.46 – 4.34 (m, 2H, -CH<sub>2</sub>CH<sub>2</sub>F), 2.62 (d, *J* = 4.6 Hz, 3H, -NHCH<sub>3</sub>), 2.18 (s, 3H, Ph-CH<sub>3</sub>).

**<sup>13</sup>C NMR** (101 MHz, DMSO) δ 180.1, 165.9, 162.4, 158.6, 139.7, 137.7, 136.4, 134.6, 134.6, 134.6, 132.3, 131.1, 129.8, 128.8, 128.6, 120.5, 96.9, 83.1(d), 69.1, 68.9, 26.4, 18.1.

<sup>19</sup>F NMR (376 MHz, DMSO-*d*<sub>6</sub>) δ -222.72 (tt, *J* = 48.0, 30.3 Hz).

HRMS (ESI) Calculated for C<sub>22</sub>H<sub>20</sub>BrCl<sub>2</sub>FN<sub>5</sub>O<sub>3</sub>S ([M + H]<sup>+</sup>) = 601.9826, found 601.9821.

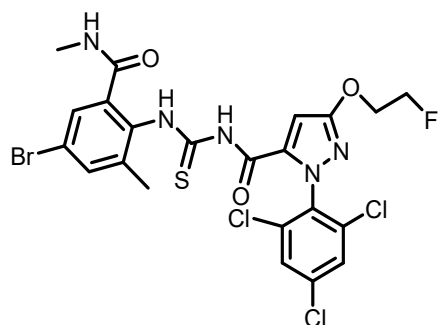

**I-3**

***N*-((4-bromo-2-methyl-6-(methylcarbamoyl)phenyl)carbamothioyl)-3-(2-fluoroethoxy)-1-(2,4,6-trichlorophenyl)-1H-pyrazole-5-carboxamide(I-3, yield: 30%, melting point: 117-123 °C, white solid)**

<sup>1</sup>H NMR (400 MHz, DMSO-*d*<sub>6</sub>) δ 11.81 (s, 1H, -CONHCS-), 11.51 (s, 1H, -Ph-NHCS-), 8.18 (d, *J* = 4.6 Hz, 1H, -CONH-), 7.94 (d, *J* = 2.0 Hz, 2H, Ph-H), 7.59 (d, *J* = 1.8 Hz, 1H, Ph-H), 7.44 (d, *J* = 2.0 Hz, 1H, Ph-H), 7.37 (s, 1H, Pyrazole-H), 4.83 – 4.68 (m, 2H, -CH<sub>2</sub>CH<sub>2</sub>F), 4.40 (dt, *J* = 30.1, 3.7 Hz, 2H, -CH<sub>2</sub>CH<sub>2</sub>F), 2.61 (d, *J* = 4.6 Hz, 3H, -NHCH<sub>3</sub>), 2.17 (s, 3H, Ph-CH<sub>3</sub>).

<sup>13</sup>C NMR (101 MHz, DMSO) δ 180.0, 165.9, 163.0, 158.1, 139.7, 136.9, 136.3, 135.9, 135.5, 134.8, 134.6, 129.8, 129.1, 128.8, 127.9, 120.5, 97.1, 83.1(d), 69.2, 69.0, 26.3, 18.1.

<sup>19</sup>F NMR (376 MHz, DMSO-*d*<sub>6</sub>) δ -222.76 (tt, *J* = 48.2, 30.2 Hz).

HRMS (ESI) Calculated for C<sub>22</sub>H<sub>18</sub>BrCl<sub>3</sub>FN<sub>5</sub>O<sub>3</sub>S ([M + H]<sup>+</sup>) = 657.9256, found 657.9247.

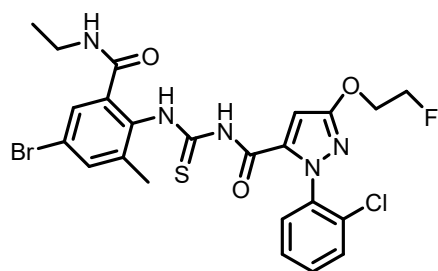

**I-4**

***N*-((4-bromo-2-(ethylcarbamoyl)-6-methylphenyl)carbamothioyl)-1-(2-chlorophenyl)-3-(2-fluoroethoxy)-1H-pyrazole-5-carboxamide(I-4, yield: 31%, melting point: 171-179 °C, white solid)**

<sup>1</sup>H NMR (400 MHz, DMSO-*d*<sub>6</sub>) δ 11.79 (s, 1H, -CONHCS-), 11.56 (s, 1H, -Ph-NHCS-), 8.17 (s, 1H, -CONH-), 7.58 (d, *J* = 8.3 Hz, 3H, Ph-H), 7.52 – 7.46 (m, 2H, Ph-H), 7.42 (s, 1H, Ph-H), 7.17 (s, 1H, Pyrazole-H), 4.75 (d, *J* = 48.0 Hz, 2H, -CH<sub>2</sub>CH<sub>2</sub>F), 4.40 (d, *J* = 30.2 Hz, 2H, -CH<sub>2</sub>CH<sub>2</sub>F), 3.12 (dq, *J* = 12.7, 6.5 Hz, 2H, -CH<sub>2</sub>CH<sub>3</sub>), 2.17 (s, 3H, Ph-CH<sub>3</sub>), 0.97 (t, *J* = 7.0 Hz, 3H, -CH<sub>2</sub>CH<sub>3</sub>).

<sup>13</sup>C NMR (101 MHz, DMSO) δ 180.3, 165.2, 162.2, 158.6, 139.5, 138.5, 137.4, 136.2, 134.4, 134.4, 131.1, 130.2, 129.8, 128.8, 128.4, 120.6, 96.6, 83.2(d), 69.0, 68.8, 34.3, 18.0, 14.8.



<sup>19</sup>F NMR (376 MHz, DMSO-*d*<sub>6</sub>) δ -222.62 (tt, *J* = 47.6, 30.3 Hz).

HRMS (ESI) Calculated for C<sub>23</sub>H<sub>22</sub>BrClFN<sub>5</sub>O<sub>3</sub>S ([M + H]<sup>+</sup>) = 582.0372, found 582.0375.

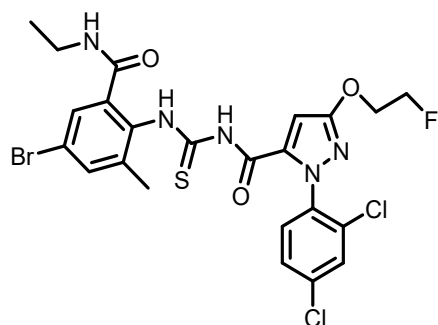

I-5

***N*-((4-bromo-2-(ethylcarbamoyl)-6-methylphenyl)carbamothioyl)-1-(2,4-dichlorophenyl)-3-(2-fluoroethoxy)-1H-pyrazole-5-carboxamide(I-5, yield: 32%, melting point: 142-163 °C, white solid)**

<sup>1</sup>H NMR (400 MHz, DMSO-*d*<sub>6</sub>) δ 11.87 (s, 1H, -CONHCS-), 11.49 (s, 1H, -Ph-NHCS-), 8.17 – 8.10 (m, 1H, -CONH-), 7.98 – 7.89 (m, 3H, Ph-H), 7.61 – 7.56 (m, 1H, Ph-H), 7.44 – 7.40 (m, 1H, Ph-H), 7.37 (s, 1H, Pyrazole-H), 4.76 (dt, *J* = 47.8, 3.5 Hz, 2H, -CH<sub>2</sub>CH<sub>2</sub>F), 4.40 (dt, *J* = 30.1, 3.5 Hz, 2H, -CH<sub>2</sub>CH<sub>2</sub>F), 3.09 (tq, *J* = 13.2, 6.0 Hz, 2H, -CH<sub>2</sub>CH<sub>3</sub>), 2.17 (s, 3H, Ph-CH<sub>3</sub>), 0.95 (t, *J* = 7.2 Hz, 3H, -CH<sub>2</sub>CH<sub>3</sub>).

<sup>13</sup>C NMR (101 MHz, DMSO) δ 180.1, 165.1, 163.0, 159.9, 158.0, 139.6, 137.5, 136.3, 135.9, 135.5, 134.9, 134.8, 134.4, 129.1, 128.8, 120.6, 97.1, 83.1(d), 69.2, 69.0, 34.3, 18.0, 14.8.

<sup>19</sup>F NMR (376 MHz, DMSO-*d*<sub>6</sub>) δ -222.74 (tt, *J* = 47.6, 30.2 Hz).

HRMS (ESI) Calculated for C<sub>23</sub>H<sub>21</sub>BrCl<sub>2</sub>FN<sub>5</sub>O<sub>3</sub>S ([M + K]<sup>+</sup>) = 653.9541, found 653.9536.

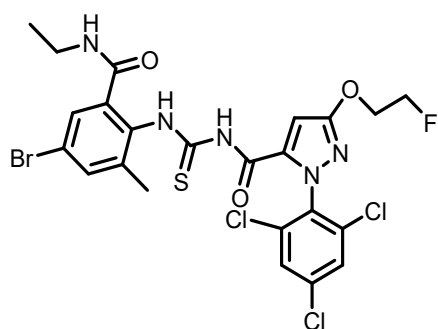

I-6

***N*-((4-bromo-2-(ethylcarbamoyl)-6-methylphenyl)carbamothioyl)-3-(2-fluoroethoxy)-1-(2,4,6-trichlorophenyl)-1H-pyrazole-5-carboxamide(I-6, yield: 34%, melting point: 150-161 °C, white solid)**

<sup>1</sup>H NMR (400 MHz, DMSO-*d*<sub>6</sub>) δ 11.84 (s, 1H, -CONHCS-), 11.49 (s, 1H, -Ph-NHCS-), 8.11 (t, *J* = 5.2 Hz, 1H, -CONH-), 7.93 – 7.90 (m, 2H, Ph-H), 7.58 (s, 1H, Ph-H), 7.41 (s, 1H, Ph-H), 7.37 (s, 1H, Pyrazole-H), 4.76 (d, *J* = 47.9 Hz, 2H, -CH<sub>2</sub>CH<sub>2</sub>F), 4.40 (d, *J* = 30.0 Hz, 2H, -CH<sub>2</sub>CH<sub>2</sub>F), 3.09 (dt, *J* = 13.5, 6.8 Hz, 2H, -CH<sub>2</sub>CH<sub>3</sub>), 2.17 (s, 3H, Ph-CH<sub>3</sub>), 0.96 (t, *J* = 7.2 Hz, 3H, -CH<sub>2</sub>CH<sub>3</sub>).

<sup>13</sup>C NMR (101 MHz, DMSO) δ 180.1, 165.1, 163.0, 159.8, 158.1, 139.6, 137.5, 136.3, 135.9, 135.5, 134.9, 134.8, 134.4, 129.1, 128.8, 120.6, 97.1, 83.1(d), 69.2, 69.0, 34.3, 18.0, 14.8.

<sup>19</sup>F NMR (376 MHz, DMSO-*d*<sub>6</sub>) δ -222.74 (tt, *J* = 47.6, 30.1 Hz).

HRMS (ESI) Calculated for C<sub>23</sub>H<sub>20</sub>BrCl<sub>3</sub>FN<sub>5</sub>O<sub>3</sub>S ([M + H]<sup>+</sup>) = 649.9593, found 649.9595.

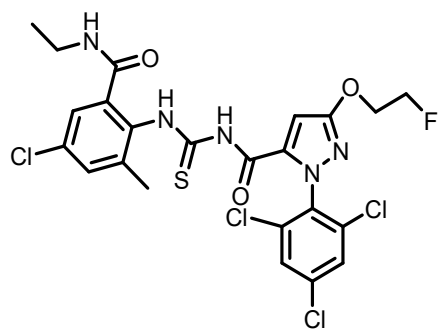

I-7

***N*-((4-chloro-2-(ethylcarbamoyl)-6-methylphenyl)carbamothioyl)-3-(2-fluoroethoxy)-1-(2,4,6-trichlorophenyl)-1H-pyrazole-5-carboxamide(I-7, yield: 32%, melting point: 147-151 °C, white solid)**

<sup>1</sup>H NMR (400 MHz, DMSO-*d*<sub>6</sub>) δ 11.86 (s, 1H, -CONHCS-), 11.49 (s, 1H, -Ph-NHCS-), 8.12 (s, 1H, -CONH-), 7.94 (s, 2H, Ph-H), 7.45 (s, 1H, Ph-H), 7.37 (s, 1H, Ph-H), 7.29 (s, 1H, Pyrazole-H), 4.76 (d, *J* = 47.9 Hz, 2H, -CH<sub>2</sub>CH<sub>2</sub>F), 4.40 (d, *J* = 29.8 Hz, 2H, -CH<sub>2</sub>CH<sub>2</sub>F), 3.14 – 3.04 (m, 2H, -CH<sub>2</sub>CH<sub>3</sub>), 2.17 (s, 3H, Ph-CH<sub>3</sub>), 0.95 (t, *J* = 6.8 Hz, 3H, -CH<sub>2</sub>CH<sub>3</sub>).

<sup>13</sup>C NMR (101 MHz, DMSO) δ 180.2, 165.2, 163.0, 160.0, 158.0, 139.3, 137.3, 136.3, 135.9, 135.5, 134.9, 133.9, 132.1, 129.1, 125.9, 100.0, 97.1, 83.1(d), 69.2, 69.0, 34.3, 18.1, 14.8.

<sup>19</sup>F NMR (376 MHz, DMSO-*d*<sub>6</sub>) δ -222.73 (tt, *J* = 48.1, 30.4 Hz).

HRMS (ESI) Calculated for C<sub>23</sub>H<sub>20</sub>Cl<sub>4</sub>FN<sub>5</sub>O<sub>3</sub>S ([M + H]<sup>+</sup>) = 606.0098, found 606.0095.

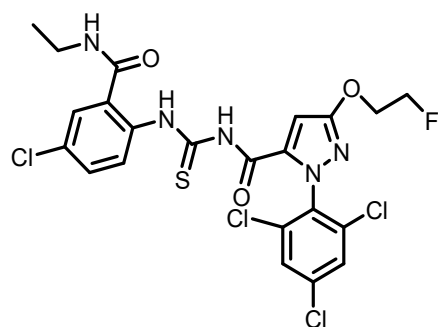

I-8

***N*-((4-chloro-2-(ethylcarbamoyl)phenyl)carbamothioyl)-3-(2-fluoroethoxy)-1-(2,4,6-trichlorophenyl)-1H-pyrazole-5-carboxamide(I-8, yield: 34%, melting point: 140-152 °C, white solid)**

<sup>1</sup>H NMR (400 MHz, DMSO-*d*<sub>6</sub>) δ 12.21 (s, 1H, -CONHCS-), 11.82 (s, 1H, -Ph-NHCS-), 8.52 (s, 1H, -CONH-), 7.93 (s, 3H, Ph-H), 7.53 (s, 2H, Ph-H), 7.35 (s, 1H, Pyrazole-H),

4.75 (d,  $J = 47.1$  Hz, 2H,  $-\text{CH}_2\text{CH}_2\text{F}$ ), 4.39 (d,  $J = 29.3$  Hz, 2H,  $-\text{CH}_2\text{CH}_2\text{F}$ ), 3.15 – 3.06 (m, 2H,  $-\text{CH}_2\text{CH}_3$ ), 1.00 (t,  $J = 6.7$  Hz, 3H,  $-\text{CH}_2\text{CH}_3$ ).

$^{13}\text{C}$  NMR (101 MHz, DMSO)  $\delta$  179.6, 172.3, 165.2, 163.0, 157.8, 136.3, 135.8, 135.5, 135.1, 134.8, 133.3, 130.9, 129.9, 129.4, 129.1, 128.0, 97.1, 83.1(d), 69.2, 69.0, 34.4, 14.7.

$^{19}\text{F}$  NMR (376 MHz, DMSO- $d_6$ )  $\delta$  -222.73 (tt,  $J = 48.0, 30.3$  Hz).

HRMS (ESI) Calculated for  $\text{C}_{22}\text{H}_{18}\text{Cl}_4\text{FN}_5\text{O}_3\text{S}$  ( $[\text{M} + \text{H}]^+$ ) = 591.9941, found 591.9943.

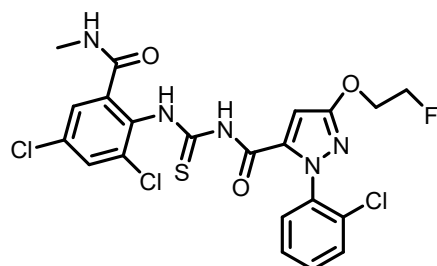

**I-9**

**1-(2-chlorophenyl)-N-((2,4-dichloro-6-(methylcarbamoyl)phenyl)carbamothioyl)-3-(2-fluoroethoxy)-1H-pyrazole-5-carboxamide(I-9, yield: 34%, melting point: 174-182 °C, white solid)**

$^1\text{H}$  NMR (400 MHz, DMSO- $d_6$ )  $\delta$  11.90 (s, 1H,  $-\text{CONHCS}-$ ), 11.60 (s, 1H,  $-\text{Ph-NHCS}-$ ), 8.26 (d,  $J = 4.6$  Hz, 1H,  $-\text{CONH}-$ ), 7.80 (d,  $J = 2.2$  Hz, 1H, Ph-H), 7.63 – 7.58 (m, 2H, Ph-H), 7.49 (dd,  $J = 5.3, 3.2$  Hz, 3H, Ph-H), 7.17 (s, 1H, Pyrazole-H), 4.75 (dt, 2H,  $-\text{CH}_2\text{CH}_2\text{F}$ ), 4.40 (dt,  $J = 30.2, 3.5$  Hz, 2H,  $-\text{CH}_2\text{CH}_2\text{F}$ ), 2.63 (d,  $J = 4.5$  Hz, 3H,  $-\text{NHCH}_3$ ).

$^{13}\text{C}$  NMR (101 MHz, DMSO)  $\delta$  180.9, 164.9, 162.2, 158.8, 138.5, 136.1, 134.3, 133.2, 133.0, 131.0, 131.0, 130.8, 130.2, 129.8, 128.5, 127.6, 96.7, 83.2(d), 69.0, 68.9, 26.4.

$^{19}\text{F}$  NMR (376 MHz, DMSO- $d_6$ )  $\delta$  -222.66 (tt,  $J = 47.7, 30.0$  Hz).

HRMS (ESI) Calculated for  $\text{C}_{21}\text{H}_{17}\text{Cl}_3\text{FN}_5\text{O}_3\text{S}$  ( $[\text{M} + \text{H}]^+$ ) = 544.0174, found 544.0176.

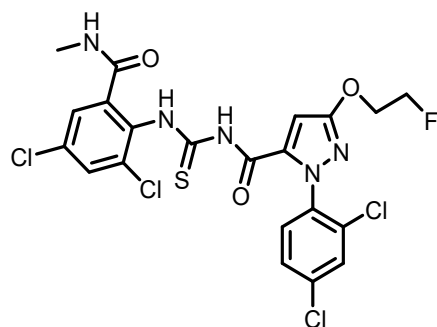

**I-10**

**N-((2,4-dichloro-6-(methylcarbamoyl)phenyl)carbamothioyl)-1-(2,4-dichlorophenyl)-3-(2-fluoroethoxy)-1H-pyrazole-5-carboxamide(I-10, yield: 29%, melting point: 173-182 °C, white solid)**

$^1\text{H}$  NMR (400 MHz, DMSO- $d_6$ )  $\delta$  11.92 (s, 1H,  $-\text{CONHCS}-$ ), 11.61 (s, 1H,  $-\text{Ph-NHCS}-$ ), 8.28 (s, 1H,  $-\text{CONH}-$ ), 7.83 (s, 2H, Ph-H), 7.62 (d,  $J = 23.2$  Hz, 2H, Ph-H), 7.51 (s, 1H, Ph-H), 7.24 (s, 1H, Pyrazole-H), 4.76 (d,  $J = 46.9$  Hz, 2H,  $-\text{CH}_2\text{CH}_2\text{F}$ ), 4.41 (d,  $J = 29.5$  Hz, 2H,  $-\text{CH}_2\text{CH}_2\text{F}$ ), 2.65 (s, 3H,  $-\text{CH}_3$ ).

**<sup>13</sup>C NMR** (101 MHz, DMSO-*d*<sub>6</sub>) δ 180.8, 164.9, 162.4, 138.5, 137.7, 136.2, 134.7, 134.3, 133.3, 133.0, 132.4, 131.1, 130.8, 129.8, 128.6, 127.6, 97.0, 83.1(d), 69.1, 68.9, 26.5.

**<sup>19</sup>F NMR** (376 MHz, DMSO-*d*<sub>6</sub>) δ -222.66 (tt, *J* = 47.9, 30.2 Hz).

**HRMS** (ESI) Calculated for C<sub>21</sub>H<sub>16</sub>Cl<sub>4</sub>FN<sub>5</sub>O<sub>3</sub>S ([M + Na]<sup>+</sup>) = 599.9604, found 599.9602.

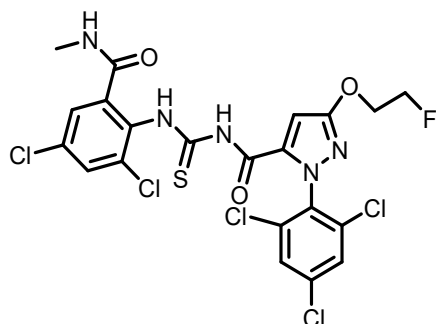

**I-11**

***N*-((2,4-dichloro-6-(methylcarbamoyl)phenyl)carbamothioyl)-3-(2-fluoroethoxy)-1-(2,4,6-trichlorophenyl)-1H-pyrazole-5-carboxamide(I-11, yield: 30%, melting point: 125-134 °C, white solid)**

**<sup>1</sup>H NMR** (400 MHz, DMSO-*d*<sub>6</sub>) δ 11.98 (s, 1H, -CONHCS-), 11.54 (s, 1H, -Ph-NHCS-), 8.24 (d, *J* = 4.4 Hz, 1H, -CONH-), 7.94 (s, 2H, Ph-H), 7.81 (s, 1H, Ph-H), 7.51 – 7.47 (m, 1H, Ph-H), 7.39 (s, 1H, Pyrazole-H), 4.76 (d, *J* = 48.0 Hz, 2H, -CH<sub>2</sub>CH<sub>2</sub>F), 4.40 (d, *J* = 29.8 Hz, 2H, -CH<sub>2</sub>CH<sub>2</sub>F), 2.63 (d, *J* = 4.1 Hz, 3H, -CH<sub>3</sub>).

**<sup>13</sup>C NMR** (101 MHz, DMSO) δ 180.6, 164.9, 163.0, 158.2, 138.5, 136.1, 135.9, 135.6, 135.0, 134.8, 134.3, 133.1, 130.8, 128.7, 127.6, 97.2, 83.1(d), 79.6, 69.2, 69.0, 26.4.

**<sup>19</sup>F NMR** (376 MHz, DMSO-*d*<sub>6</sub>) δ -222.75 (tt, *J* = 48.1, 30.1 Hz).

**HRMS** (ESI) Calculated for C<sub>21</sub>H<sub>15</sub>Cl<sub>5</sub>FN<sub>5</sub>O<sub>3</sub>S ([M + Na]<sup>+</sup>) = 633.9214, found 633.9211.

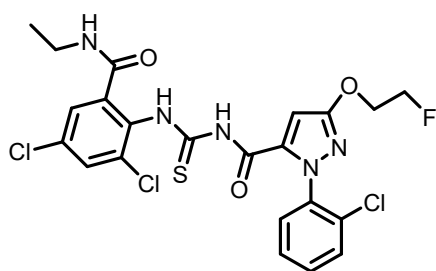

**I-12**

**1-(2-chlorophenyl)-*N*-((2,4-dichloro-6-(ethylcarbamoyl)phenyl)carbamothioyl)-3-(2-fluoroethoxy)-1H-pyrazole-5-carboxamide(I-12, yield: 33%, melting point: 149-158 °C, white solid)**

**<sup>1</sup>H NMR** (400 MHz, DMSO-*d*<sub>6</sub>) δ 11.92 (s, 1H, -CONHCS-), 11.58 (s, 1H, -Ph-NHCS-), 8.19 (t, *J* = 5.5 Hz, 1H, -CONH-), 7.81 (d, *J* = 2.4 Hz, 1H, Ph-H), 7.64 – 7.57 (m, 2H, Ph-H), 7.53 – 7.45 (m, 3H, Ph-H), 7.20 (s, 1H, Pyrazole-H), 4.85 – 4.67 (m, 2H, -CH<sub>2</sub>CH<sub>2</sub>F), 4.47 – 4.34 (m, 2H, -CH<sub>2</sub>CH<sub>2</sub>F), 3.16 (dd, 1H, -CH<sub>2</sub>CH<sub>3</sub>), 3.07 (dd, *J* = 13.1, 6.5 Hz, 1H, -CH<sub>2</sub>CH<sub>3</sub>), 0.96 (t, *J* = 7.2 Hz, 3H, -CH<sub>2</sub>CH<sub>3</sub>).

**<sup>13</sup>C NMR** (101 MHz, DMSO) δ 180.9, 164.1, 162.2, 158.7, 139.1, 138.6, 136.0, 134.2, 133.1, 131.2, 131.0, 130.6, 130.2, 129.9, 128.4, 127.6, 96.7, 83.2(d), 69.0, 68.8, 34.4, 14.8.

<sup>19</sup>F NMR (376 MHz, DMSO-*d*<sub>6</sub>) δ -222.69 (tt, *J* = 47.7, 30.3 Hz).

HRMS (ESI) Calculated for C<sub>22</sub>H<sub>19</sub>Cl<sub>3</sub>FN<sub>5</sub>O<sub>3</sub>S ([M + H]<sup>+</sup>) = 558.0331, found 558.0328.

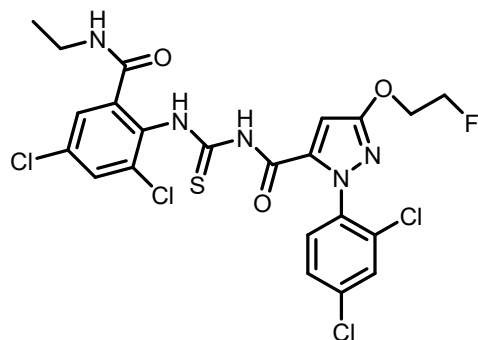

I-13

***N*-((2,4-dichloro-6-(ethylcarbamoyl)phenyl)carbamothioyl)-1-(2,4-dichlorophenyl)-3-(2-fluoroethoxy)-1H-pyrazole-5-carboxamide(I-13, yield: 33%, melting point: 156-163 °C, white solid)**

<sup>1</sup>H NMR (400 MHz, DMSO-*d*<sub>6</sub>) δ 11.95 (s, 1H, -CONHCS-), 11.59 (s, 1H, -Ph-NHCS-), 8.20 (s, 1H, -CONH-), 7.81 (d, *J* = 10.7 Hz, 2H, Ph-H), 7.64 (d, *J* = 8.5 Hz, 1H, Ph-H), 7.58 (d, *J* = 8.2 Hz, 1H, Ph-H), 7.48 (s, 1H, Ph-H), 7.25 (s, 1H, Pyrazole-H), 4.76 (d, *J* = 47.9 Hz, 2H, -CH<sub>2</sub>CH<sub>2</sub>F), 4.41 (d, *J* = 30.1 Hz, 2H, -CH<sub>2</sub>CH<sub>2</sub>F), 3.13 (ddd, *J* = 30.8, 12.6, 6.1 Hz, 2H, -CH<sub>2</sub>CH<sub>3</sub>), 0.98 (t, *J* = 7.1 Hz, 3H, -CH<sub>2</sub>CH<sub>3</sub>).

<sup>13</sup>C NMR (101 MHz, DMSO) δ 180.9, 164.1, 162.4, 158.6, 139.1, 137.7, 136.2, 134.8, 134.2, 133.1, 132.6, 131.2, 130.6, 129.8, 128.6, 127.6, 97.0, 83.1(d), 69.1, 68.9, 34.4, 14.8.

<sup>19</sup>F NMR (376 MHz, DMSO-*d*<sub>6</sub>) δ -222.66 (tt, *J* = 48.0, 30.2 Hz).

HRMS (ESI) Calculated for C<sub>22</sub>H<sub>18</sub>Cl<sub>4</sub>FN<sub>5</sub>O<sub>3</sub>S ([M + Na]<sup>+</sup>) = 613.9761, found 613.9762.

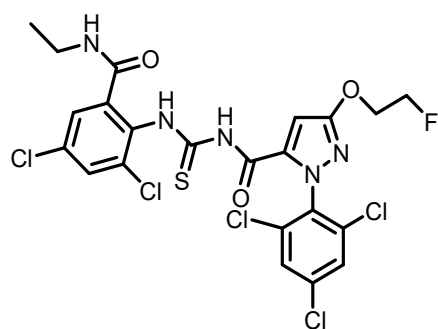

I-14

***N*-((2,4-dichloro-6-(ethylcarbamoyl)phenyl)carbamothioyl)-3-(2-fluoroethoxy)-1-(2,4,6-trichlorophenyl)-1H-pyrazole-5-carboxamide(I-14, yield: 32%, melting point: 147-167 °C, white solid)**

<sup>1</sup>H NMR (400 MHz, DMSO-*d*<sub>6</sub>) δ 12.00 (s, 1H, -CONHCS-), 11.52 (s, 1H, -Ph-NHCS-), 8.15 (s, 1H, -CONH-), 7.93 (s, 2H, Ph-H), 7.81 (s, 1H, Ph-H), 7.46 (s, 1H, Ph-H), 7.38 (s, 1H, Pyrazole-H), 4.75 (d, *J* = 47.7 Hz, 2H, -CH<sub>2</sub>CH<sub>2</sub>F), 4.40 (d, *J* = 30.3 Hz, 2H, -CH<sub>2</sub>CH<sub>2</sub>F), 3.11 (dd, *J* = 38.6, 5.9 Hz, 2H, -CH<sub>2</sub>CH<sub>3</sub>), 0.95 (t, 3H, -CH<sub>2</sub>CH<sub>3</sub>)

<sup>13</sup>C NMR (101 MHz, DMSO) δ 180.7, 164.0, 163.0, 158.2, 139.1, 136.1, 135.9, 135.6, 134.9, 134.2, 133.2, 130.6, 129.1, 127.6, 97.2, 83.1(d), 69.2, 34.4, 31.4, 22.5, 14.7, 14.4.

<sup>19</sup>F NMR (376 MHz, DMSO-*d*<sub>6</sub>) δ -222.77 (tt, *J* = 47.7, 30.1 Hz).

HRMS (ESI) Calculated for C<sub>22</sub>H<sub>17</sub>Cl<sub>5</sub>FN<sub>5</sub>O<sub>3</sub>S ([M + Na]<sup>+</sup>) = 647.9371, found 647.9372.

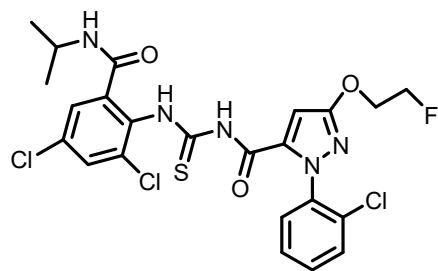

**I-15**

**1-(2-chlorophenyl)-*N*-((2,4-dichloro-6-(isopropylcarbamoyl)phenyl)carbamothioyl)-3-(2-fluoroethoxy)-1H-pyrazole-5-carboxamide(I-15, yield: 33%, melting point: 177-182 °C, white solid)**

<sup>1</sup>H NMR (400 MHz, DMSO-*d*<sub>6</sub>) δ 11.96 (s, 1H, -CONHCS-), 11.58 (s, 1H, -Ph-NHCS-), 8.01 (d, *J* = 7.6 Hz, 1H, -CONH-), 7.78 (d, *J* = 2.1 Hz, 1H, Ph-H), 7.63 – 7.54 (m, 2H, Ph-H), 7.49 (dd, *J* = 6.8, 3.5 Hz, 2H, Ph-H), 7.44 (d, *J* = 2.1 Hz, 1H, Ph-H), 7.19 (s, 1H, Pyrazole-H), 4.75 (dt, *J* = 47.8, 3.4 Hz, 2H, -CH<sub>2</sub>CH<sub>2</sub>F), 4.40 (dt, *J* = 30.2, 3.4 Hz, 2H, -CH<sub>2</sub>CH<sub>2</sub>F), 3.87 (dt, *J* = 13.3, 6.6 Hz, 1H, -CH(CH<sub>3</sub>)<sub>2</sub>), 1.00 (d, *J* = 6.6 Hz, 6H, -CH(CH<sub>3</sub>)<sub>2</sub>).

<sup>13</sup>C NMR (101 MHz, DMSO) δ 181.0, 163.4, 162.2, 158.6, 139.4, 138.6, 136.0, 134.0, 133.2, 131.1, 130.5, 130.2, 129.9, 128.4, 127.7, 96.7, 83.2(d), 69.0, 68.9, 41.6, 41.2, 23.7, 22.5.

<sup>19</sup>F NMR (376 MHz, DMSO-*d*<sub>6</sub>) δ -222.65 (tt, *J* = 47.3, 29.6 Hz).

HRMS (ESI) Calculated for C<sub>23</sub>H<sub>21</sub>Cl<sub>3</sub>FN<sub>5</sub>O<sub>3</sub>S ([M + H]<sup>+</sup>) = 572.0487, found 572.0487.

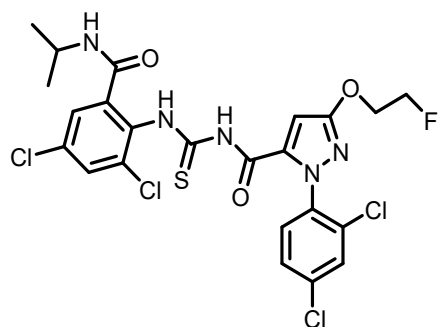

**I-16**

***N*-((2,4-dichloro-6-(isopropylcarbamoyl)phenyl)carbamothioyl)-1-(2,4-dichlorophenyl)-3-(2-fluoroethoxy)-1H-pyrazole-5-carboxamide(I-16, yield: 34%, melting point: 166-180 °C, white solid)**

<sup>1</sup>H NMR (400 MHz, DMSO-*d*<sub>6</sub>) δ 11.97 (s, 1H, -CONHCS-), 11.56 (s, 1H, -Ph-NHCS-), 8.00 (d, *J* = 7.6 Hz, 1H, -CONH-), 7.86 – 7.83 (m, 1H, Ph-H), 7.80 (d, *J* = 2.2 Hz, 1H, Ph-H), 7.66 – 7.56 (m, 2H, Ph-H), 7.45 (d, *J* = 2.2 Hz, 1H, Ph-H), 7.24 (s, 1H, Pyrazole-H), 4.75 (dt, *J* = 47.8, 3.4 Hz, 2H, -CH<sub>2</sub>CH<sub>2</sub>F), 4.40 (dt, *J* = 30.1, 3.4 Hz, 2H, -CH<sub>2</sub>CH<sub>2</sub>F), 3.87 (dq, *J* = 13.4, 6.6 Hz, 1H, -CH(CH<sub>3</sub>)<sub>2</sub>), 0.99 (dd, *J* = 13.0, 6.5 Hz, 6H, -CH(CH<sub>3</sub>)<sub>2</sub>).

<sup>13</sup>C NMR (101 MHz, DMSO) δ 180.9, 172.3, 163.3, 162.4, 158.5, 139.4, 137.7, 136.1, 134.8, 133.1, 132.7, 131.3, 130.5, 129.8, 128.6, 127.7, 100.0, 97.0, 83.1(d), 69.1, 68.9, 41.5, 22.5.

<sup>19</sup>F NMR (376 MHz, DMSO-*d*<sub>6</sub>) δ -222.72 (tt, *J* = 47.6, 30.3 Hz).

HRMS (ESI) Calculated for C<sub>23</sub>H<sub>20</sub>Cl<sub>4</sub>FN<sub>5</sub>O<sub>3</sub>S ([M + Na]<sup>+</sup>) = 627.9917, found 627.9918.

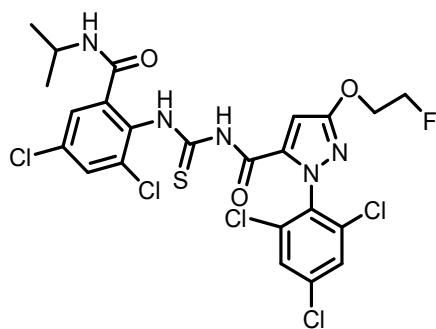

I-17

***N*-((2,4-dichloro-6-(isopropylcarbamoyl)phenyl)carbamothioyl)-3-(2-fluoroethoxy)-1-(2,4,6-trichlorophenyl)-1H-pyrazole-5-carboxamide(I-17, yield: 30%, melting point: 154-165 °C, white solid)**

<sup>1</sup>H NMR (400 MHz, DMSO-*d*<sub>6</sub>) δ 12.03 (s, 1H, -CONHCS-), 11.52 (s, 1H, -Ph-NHCS-), 7.98 (d, *J* = 6.3 Hz, 1H, -CONH-), 7.92 (d, *J* = 14.4 Hz, 2H, Ph-H), 7.79 (s, 1H, Ph-H), 7.45 (s, 1H, Ph-H), 7.38 (s, 1H, Pyrazole-H), 4.75 (d, *J* = 47.9 Hz, 2H, -CH<sub>2</sub>CH<sub>2</sub>F), 4.40 (d, *J* = 29.9 Hz, 2H, -CH<sub>2</sub>CH<sub>2</sub>F), 3.90 – 3.81 (m, 1H, -CH(CH<sub>3</sub>)<sub>2</sub>), 0.98 (dd, *J* = 11.8, 5.8 Hz, 6H, -CH(CH<sub>3</sub>)<sub>2</sub>).

<sup>13</sup>C NMR (101 MHz, DMSO-*d*<sub>6</sub>) δ 180.8, 163.3, 163.0, 158.1, 139.5, 136.1, 135.9, 135.6, 135.1, 134.9, 133.2, 131.5, 130.5, 129.1, 127.7, 97.3, 83.1(d), 69.2, 69.0, 41.5, 22.5, 22.3, 14.8.

<sup>19</sup>F NMR (376 MHz, DMSO-*d*<sub>6</sub>) δ -222.74 (tt, *J* = 47.8, 30.3 Hz).

HRMS (ESI) Calculated for C<sub>23</sub>H<sub>19</sub>Cl<sub>5</sub>FN<sub>5</sub>O<sub>3</sub>S ([M + Na]<sup>+</sup>) = 661.9527, found 661.9525.

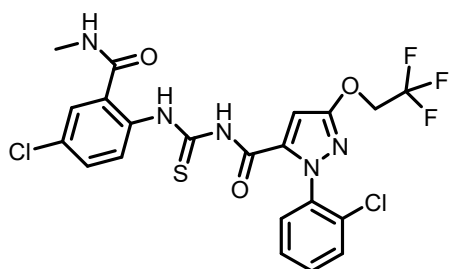

II-1

***N*-((4-chloro-2-(methylcarbamoyl)phenyl)carbamothioyl)-1-(2-chlorophenyl)-3-(2,2,2-trifluoroethoxy)-1H-pyrazole-5-carboxamide(II-1, yield: 32%, melting point: 171-180 °C, white solid)**

<sup>1</sup>H NMR (400 MHz, DMSO-*d*<sub>6</sub>) δ 12.42 (s, 1H, -CONHCS-), 11.78 (s, 1H, -Ph-NHCS-), 8.63 – 8.54 (m, 1H, -CONH-), 8.03 (d, *J* = 8.7 Hz, 1H, Ph-H), 7.65 – 7.48 (m, 6H, Ph-H), 7.23 (s, 1H, Pyrazole-H), 4.90 (q, *J* = 8.7 Hz, 2H, -CH<sub>2</sub>CF<sub>3</sub>), 2.64 (d, *J* = 4.2 Hz, 3H, -NHCH<sub>3</sub>).

<sup>13</sup>C NMR (101 MHz, DMSO) δ 179.5, 166.0, 161.0, 158.1, 138.2, 136.9, 135.4, 132.0, 131.1, 130.9(t), 129.8, 128.5, 125.4, 124.3, 122.7, 120.2, 100.0, 96.7, 65.8, 65.5, 26.5.

<sup>19</sup>F NMR (376 MHz, DMSO-*d*<sub>6</sub>) δ -72.73 (t, *J* = 9.0 Hz).

HRMS (ESI) Calculated for C<sub>21</sub>H<sub>16</sub>Cl<sub>2</sub>F<sub>3</sub>N<sub>5</sub>O<sub>3</sub>S ([M + H]<sup>+</sup>) = 546.0376, found 546.0372.

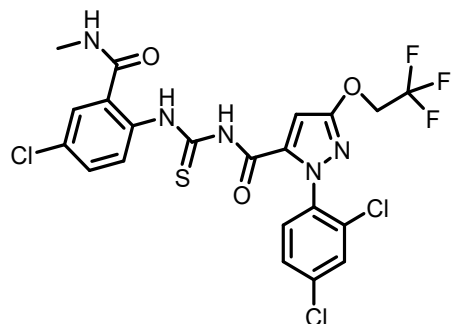

II-2

***N*-((4-chloro-2-(methylcarbamoyl)phenyl)carbamothioyl)-1-(2,4-dichlorophenyl)-3-(2,2,2-trifluoroethoxy)-1H-pyrazole-5-carboxamide(II-2, yield: 31%, melting point: 175-191 °C, white solid)**

<sup>1</sup>H NMR (400 MHz, DMSO-*d*<sub>6</sub>) δ 12.41 (s, 1H, -CONHCS-), 11.79 (s, 1H, -Ph-NHCS-), 8.59 (d, *J* = 4.5 Hz, 1H, -CONH-), 8.03 (d, *J* = 8.7 Hz, 1H, Ph-H), 7.85 (d, *J* = 1.8 Hz, 1H, Ph-H), 7.65 – 7.53 (m, 4H, Ph-H), 7.26 (s, 1H, Pyrazole-H), 4.90 (q, *J* = 8.8 Hz, 2H, -CH<sub>2</sub>CF<sub>3</sub>), 2.64 (d, *J* = 4.4 Hz, 3H, -NHCH<sub>3</sub>).

<sup>13</sup>C NMR (101 MHz, DMSO) δ 179.4, 166.0, 161.2, 158.0, 137.3, 135.4, 134.9, 132.2, 131.1(t), 129.3, 128.7, 125.4, 122.6, 97.0, 79.6, 65.9, 65.5, 60.2, 26.4, 21.2, 14.6.

<sup>19</sup>F NMR (376 MHz, DMSO-*d*<sub>6</sub>) δ -72.75 (t, *J* = 9.0 Hz).

HRMS (ESI) Calculated for C<sub>21</sub>H<sub>15</sub>Cl<sub>3</sub>F<sub>3</sub>N<sub>5</sub>O<sub>3</sub>S ([M + Na]<sup>+</sup>) = 601.9805, found 601.9804.

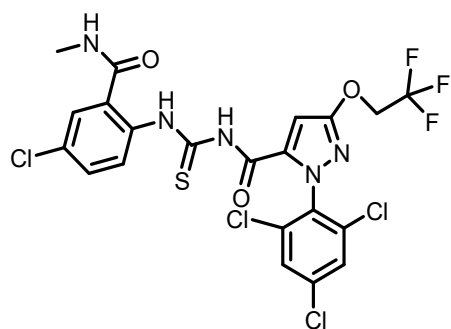

II-3

***N*-((4-chloro-2-(methylcarbamoyl)phenyl)carbamothioyl)-1-(2,4,6-trichlorophenyl)-3-(2,2,2-trifluoroethoxy)-1H-pyrazole-5-carboxamide(II-3, yield: 31%, melting point: 166-172 °C, white solid )**

<sup>1</sup>H NMR (400 MHz, DMSO-*d*<sub>6</sub>) δ 12.31 (s, 1H, -CONHCS-), 11.86 (s, 1H, -Ph-NHCS-), 8.59 (s, 1H, -CONH-), 8.01 (d, *J* = 8.6 Hz, 1H, Ph-H), 7.94 (s, 2H, Ph-H), 7.60 – 7.52 (m, 2H, Ph-H), 7.43 (s, 1H, Pyrazole-H), 4.91 (q, *J* = 8.7 Hz, 2H, -CH<sub>2</sub>CF<sub>3</sub>), 2.64 (d, *J* = 4.1 Hz, 3H, -NHCH<sub>3</sub>).

<sup>13</sup>C NMR (101 MHz, DMSO) δ 179.4, 166.0, 161.8, 157.5, 136.9, 135.7, 135.5, 135.3, 134.7, 132.2, 130.8(t), 129.1, 127.9, 125.4, 122.6, 97.1, 66.2, 65.9, 65.5, 65.2, 26.4.



<sup>19</sup>F NMR (376 MHz, DMSO-*d*<sub>6</sub>) δ -72.67 (t, *J* = 8.9 Hz).

HRMS (ESI) Calculated for C<sub>21</sub>H<sub>14</sub>Cl<sub>4</sub>F<sub>3</sub>N<sub>5</sub>O<sub>3</sub>S ([M + Na]<sup>+</sup>) = 635.9416, found 635.9413.

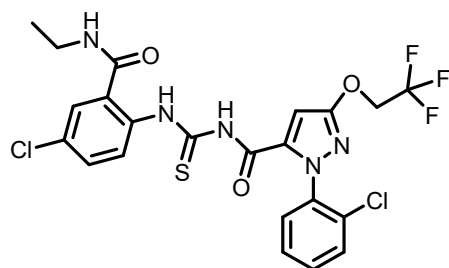

II-4

***N*-((4-chloro-2-(ethylcarbamoyl)phenyl)carbamothioyl)-1-(2-chlorophenyl)-3-(2,2,2-trifluoroethoxy)-1H-pyrazole-5-carboxamide(II-4, yield: 29%, melting point: 127-136 °C, white solid)**

<sup>1</sup>H NMR (400 MHz, DMSO-*d*<sub>6</sub>) δ 12.31 (s, 1H, -CONHCS-), 11.78 (s, 1H, -Ph-NHCS-), 8.55 (t, *J* = 5.2 Hz, 1H, -CONH-), 7.98 (d, *J* = 8.3 Hz, 1H, Ph-H), 7.65 – 7.51 (m, 6H, Ph-H), 7.22 (s, 1H, Pyrazole-H), 4.90 (q, *J* = 8.8 Hz, 2H, -CH<sub>2</sub>CF<sub>3</sub>), 3.12 (p, *J* = 7.0 Hz, 2H, -CH<sub>2</sub>CH<sub>3</sub>), 1.01 (t, *J* = 7.2 Hz, 3H, -CH<sub>2</sub>CH<sub>3</sub>).

<sup>13</sup>C NMR (101 MHz, DMSO) δ 179.7, 165.3, 161.0, 158.1, 138.1, 136.9, 135.3, 132.8, 131.1, 130.9, 130.8(t), 130.2, 130.0, 129.8, 129.4, 128.5, 128.0, 96.7, 65.8, 65.5, 34.4, 14.8.

<sup>19</sup>F NMR (376 MHz, DMSO-*d*<sub>6</sub>) δ -72.73 (t, *J* = 8.7 Hz).

HRMS (ESI) Calculated for C<sub>22</sub>H<sub>18</sub>Cl<sub>2</sub>F<sub>3</sub>N<sub>5</sub>O<sub>3</sub>S ([M + Na]<sup>+</sup>) = 582.0352, found 582.0346.

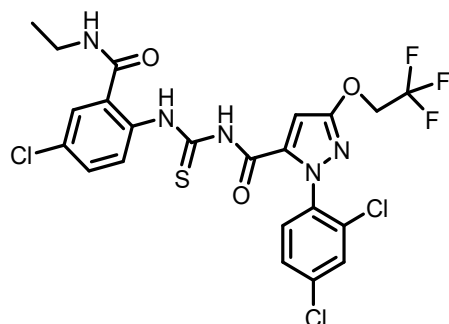

II-5

***N*-((4-chloro-2-(ethylcarbamoyl)phenyl)carbamothioyl)-1-(2,4-dichlorophenyl)-3-(2,2,2-trifluoroethoxy)-1H-pyrazole-5-carboxamide(II-5, yield: 30%, melting point: 151-164 °C, white solid)**

<sup>1</sup>H NMR (400 MHz, DMSO-*d*<sub>6</sub>) δ 12.36 (s, 1H, -CONHCS-), 11.81 (s, 1H, -Ph-NHCS-), 8.58 (s, 1H, -CONH-), 8.02 (d, *J* = 8.4 Hz, 1H, Ph-H), 7.82 (s, 1H, Ph-H), 7.65 – 7.51 (m, 4H, Ph-H), 7.27 (s, 1H, Pyrazole-H), 4.90 (q, *J* = 8.4 Hz, 2H, -CH<sub>2</sub>CF<sub>3</sub>), 3.18 – 3.06 (m, 2H, -CH<sub>2</sub>CH<sub>3</sub>), 1.01 (t, *J* = 6.8 Hz, 3H, -CH<sub>2</sub>CH<sub>3</sub>).

<sup>13</sup>C NMR (101 MHz, DMSO) δ 179.5, 165.3, 161.2, 158.0, 140.8, 137.3, 136.9, 135.3, 134.9, 132.2(t), 129.8, 128.0, 125.4, 122.6, 119.9, 100.0, 97.0, 65.9, 65.5, 65.2, 34.5, 14.7.

<sup>19</sup>F NMR (376 MHz, DMSO-*d*<sub>6</sub>) δ -72.74 (t, *J* = 8.8 Hz).

HRMS (ESI) Calculated for C<sub>22</sub>H<sub>17</sub>Cl<sub>3</sub>F<sub>3</sub>N<sub>5</sub>O<sub>3</sub>S ([M + Na]<sup>+</sup>) = 615.9962, found 615,9956.

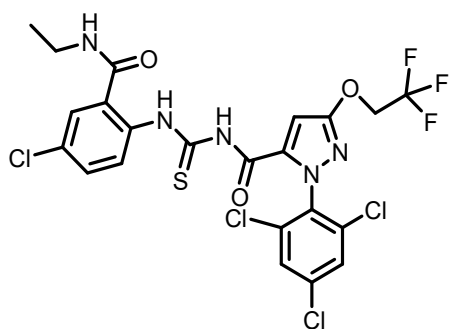

II-6

***N*-((4-chloro-2-(ethylcarbamoyl)phenyl)carbamothioyl)-1-(2,4,6-trichlorophenyl)-3-(2,2,2-trifluoroethoxy)-1H-pyrazole-5-carboxamide(II-6, yield 34%, melting point: 108-117 °C, white solid)**

**<sup>1</sup>H NMR** (400 MHz, DMSO-*d*<sub>6</sub>) δ 12.23 (s, 1H, -CONHCS-), 11.88 (s, 1H, -Ph-NHCS-), 8.54 (s, 1H, -CONH-), 7.97 (d, *J* = 8.3 Hz, 1H, Ph-H), 7.92 (s, 2H, Ph-H), 7.53 (d, *J* = 8.3 Hz, 2H, Ph-H), 7.44 (s, 1H, Pyrazole-H), 4.91 (q, *J* = 8.6 Hz, 2H, -CH<sub>2</sub>CF<sub>3</sub>), 3.17 – 3.07 (m, 2H, -CH<sub>2</sub>CH<sub>3</sub>), 1.00 (t, *J* = 7.1 Hz, 3H, -CH<sub>2</sub>CH<sub>3</sub>).

**<sup>13</sup>C NMR** (101 MHz, DMSO) δ 179.5, 165.2, 161.8, 157.6, 136.8, 135.7, 135.5, 134.7, 133.2, 130.9, 130.0(t), 129.3, 129.1, 128.0, 125.4, 122.6, 120.5, 97.1, 65.9, 65.5, 34.4, 14.7.

**<sup>19</sup>F NMR** (376 MHz, DMSO-*d*<sub>6</sub>) δ -72.71 (t, *J* = 8.7 Hz).

HRMS (ESI) Calculated for C<sub>22</sub>H<sub>16</sub>Cl<sub>4</sub>F<sub>3</sub>N<sub>5</sub>O<sub>3</sub>S ([M + Na]<sup>+</sup>) = 649.9572, found 649.9569.

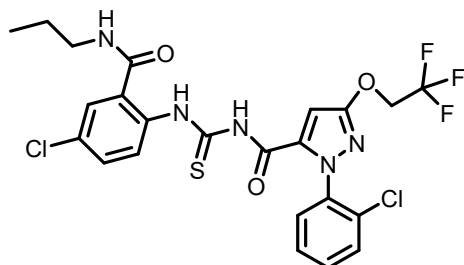

II-7

***N*-((4-chloro-2-(propylcarbamoyl)phenyl)carbamothioyl)-1-(2-chlorophenyl)-3-(2,2,2-trifluoroethoxy)-1H-pyrazole-5-carboxamide(II-7, yield: 30%, melting point: 137-148 °C, white solid)**

**<sup>1</sup>H NMR** (400 MHz, DMSO-*d*<sub>6</sub>) δ 12.29 (s, 1H, -CONHCS-), 11.79 (s, 1H, -Ph-NHCS-), 8.56 (t, *J* = 5.4 Hz, 1H, -CONH-), 7.95 (d, *J* = 8.2 Hz, 1H, Ph-H), 7.64 – 7.50 (m, 6H, Ph-H), 7.22 (s, 1H, Pyrazole-H), 4.90 (q, *J* = 8.8 Hz, 2H, -CH<sub>2</sub>CF<sub>3</sub>), 3.06 (q, *J* = 6.5 Hz, 2H, -CH<sub>2</sub>CH<sub>2</sub>CH<sub>3</sub>), 1.42 (q, *J* = 7.2 Hz, 2H, -CH<sub>2</sub>CH<sub>2</sub>CH<sub>3</sub>), 0.83 (t, *J* = 7.3 Hz, 3H, -CH<sub>2</sub>CH<sub>2</sub>CH<sub>3</sub>).

**<sup>13</sup>C NMR** (101 MHz, DMSO) δ 179.8, 165.5, 161.0, 158.1, 138.2, 136.9, 135.3, 133.0, 131.1, 130.9, 130.8, 130.2(t), 130.0, 129.8, 129.6, 128.4, 128.0, 96.7, 65.8, 65.5, 41.3, 22.5, 11.9.

**<sup>19</sup>F NMR** (376 MHz, DMSO-*d*<sub>6</sub>) δ -72.77 (t, *J* = 8.9 Hz).

HRMS (ESI) Calculated for C<sub>23</sub>H<sub>20</sub>Cl<sub>2</sub>F<sub>3</sub>N<sub>5</sub>O<sub>3</sub>S ([M + Na]<sup>+</sup>) = 596.0508, found 596.0503.

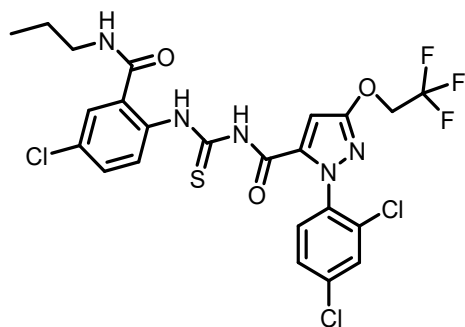

**II-8**

***N*-((4-chloro-2-(propylcarbamoyl)phenyl)carbamothioyl)-1-(2,4-dichlorophenyl)-3-(2,2,2-trifluoroethoxy)-1H-pyrazole-5-carboxamide(II-8, yield: 31%, melting point: 184-195 °C, white solid)**

**<sup>1</sup>H NMR** (400 MHz, DMSO-*d*<sub>6</sub>) δ 12.29 (s, 1H, -CONHCS-), 11.81 (s, 1H, -Ph-NHCS-), 8.56 (t, *J* = 5.5 Hz, 1H, -CONH-), 7.97 (d, *J* = 9.4 Hz, 1H, Ph-H), 7.83 (d, *J* = 2.1 Hz, 1H, Ph-H), 7.65 – 7.51 (m, 4H, Ph-H), 7.25 (s, 1H, Pyrazole-H), 4.90 (q, *J* = 8.8 Hz, 2H, -CH<sub>2</sub>CF<sub>3</sub>), 3.06 (q, *J* = 6.7 Hz, 2H, -CH<sub>2</sub>CH<sub>2</sub>CH<sub>3</sub>), 1.42 (h, *J* = 7.2 Hz, 2H, -CH<sub>2</sub>CH<sub>2</sub>CH<sub>3</sub>), 0.83 (t, *J* = 7.4 Hz, 3H, -CH<sub>2</sub>CH<sub>2</sub>CH<sub>3</sub>).

**<sup>13</sup>C NMR** (101 MHz, DMSO) δ 179.6, 165.5, 161.2, 158.0, 141.8, 137.3, 136.9, 135.2, 134.8, 132.9, 132.2(t), 129.8, 129.4, 128.6, 128.0, 125.4, 122.6, 96.9, 65.9, 65.5, 41.3, 22.5, 11.9.

**<sup>19</sup>F NMR** (376 MHz, DMSO-*d*<sub>6</sub>) δ -72.73 (t, *J* = 8.8 Hz).

**HRMS** (ESI) Calculated for C<sub>23</sub>H<sub>19</sub>Cl<sub>3</sub>F<sub>3</sub>N<sub>5</sub>O<sub>3</sub>S ([M + Na]<sup>+</sup>) = 630.0118, found 630.0116.

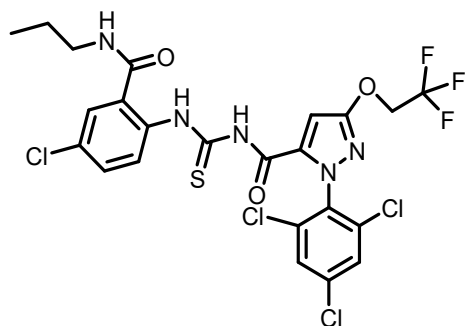

**II-9**

***N*-((4-chloro-2-(propylcarbamoyl)phenyl)carbamothioyl)-1-(2,4,6-trichlorophenyl)-3-(2,2,2-trifluoroethoxy)-1H-pyrazole-5-carboxamide(II-9, yield: 31%, melting point: 141-149 °C, white solid)**

**<sup>1</sup>H NMR** (400 MHz, DMSO-*d*<sub>6</sub>) δ 12.17 (s, 1H, -CONHCS-), 11.87 (s, 1H, -Ph-NHCS-), 8.51 (t, *J* = 5.1 Hz, 1H, -CONH-), 7.91 (d, *J* = 6.5 Hz, 3H, Ph-H), 7.53 (d, *J* = 6.4 Hz, 2H, Ph-H), 7.43 (s, 1H, Pyrazole-H), 4.91 (q, *J* = 8.7 Hz, 2H, -CH<sub>2</sub>CF<sub>3</sub>), 3.06 (q, *J* = 6.4 Hz, 2H, -CH<sub>2</sub>CH<sub>2</sub>CH<sub>3</sub>), 1.42 (h, *J* = 7.0 Hz, 2H, -CH<sub>2</sub>CH<sub>2</sub>CH<sub>3</sub>), 0.83 (t, *J* = 7.3 Hz, 3H, -CH<sub>2</sub>CH<sub>2</sub>CH<sub>3</sub>).

**<sup>13</sup>C NMR** (101 MHz, DMSO) δ 179.7, 165.4, 161.8, 157.6, 136.8, 135.7, 135.5, 135.1, 134.8, 133.5(t), 129.1, 128.0, 125.4, 122.6, 97.1, 79.6, 65.9, 65.5, 65.2, 41.3, 22.5, 11.9, 11.8.

**<sup>19</sup>F NMR** (376 MHz, DMSO-*d*<sub>6</sub>) δ -72.69 (t, *J* = 8.9 Hz).

HRMS (ESI) Calculated for C<sub>23</sub>H<sub>18</sub>Cl<sub>4</sub>F<sub>3</sub>N<sub>5</sub>O<sub>3</sub>S ([M + Na]<sup>+</sup>) = 663.9729, found 663.9727.

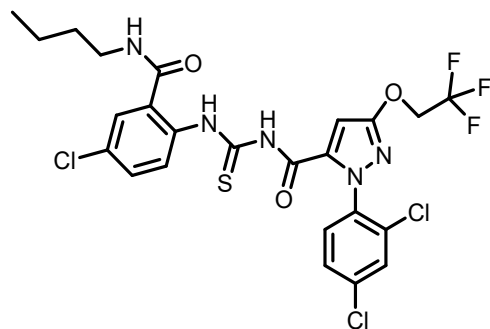

II-10

***N*-((2-(butylcarbamoyl)-4-chlorophenyl)carbamothioyl)-1-(2,4-dichlorophenyl)-3-(2,2,2-trifluoroethoxy)-1H-pyrazole-5-carboxamide(II-10, yield: 32%, melting point: 179-191 °C, white solid)**

**<sup>1</sup>H NMR** (400 MHz, DMSO-*d*<sub>6</sub>) δ 12.28 (s, 1H, -CONHCS-), 11.80 (s, 1H, -Ph-NHCS-), 8.53 (t, *J* = 5.4 Hz, 1H, -CONH-), 7.95 (d, *J* = 9.4 Hz, 1H, Ph-H), 7.82 (d, *J* = 2.0 Hz, 1H, Ph-H), 7.65 – 7.52 (m, 4H, Ph-H), 7.26 (s, 1H, Pyrazole-H), 4.90 (q, *J* = 8.8 Hz, 2H, -CH<sub>2</sub>CF<sub>3</sub>), 3.10 (q, *J* = 6.6 Hz, 2H, -CH<sub>2</sub>CH<sub>2</sub>CH<sub>2</sub>CH<sub>3</sub>), 1.40 (p, *J* = 6.9 Hz, 2H, -CH<sub>2</sub>CH<sub>2</sub>CH<sub>2</sub>CH<sub>3</sub>), 1.29 – 1.23 (m, 2H, -CH<sub>2</sub>CH<sub>2</sub>CH<sub>2</sub>CH<sub>3</sub>), 0.85 (t, *J* = 7.3 Hz, 3H, -CH<sub>2</sub>CH<sub>2</sub>CH<sub>2</sub>CH<sub>3</sub>).

**<sup>13</sup>C NMR** (101 MHz, DMSO) δ 179.7, 175.1, 165.4, 161.2, 158.0, 137.3, 136.9, 135.2, 134.8, 133.0, 132.2(t), 129.8, 129.5, 128.7, 128.0, 125.4, 122.6, 120.5, 97.0, 65.9, 65.5, 31.3, 20.0, 14.1.

**<sup>19</sup>F NMR** (376 MHz, DMSO-*d*<sub>6</sub>) δ -72.73 (t, *J* = 8.8 Hz).

HRMS (ESI) Calculated for C<sub>24</sub>H<sub>21</sub>Cl<sub>3</sub>F<sub>3</sub>N<sub>5</sub>O<sub>3</sub>S ([M + Na]<sup>+</sup>) = 644.0275, found 644.0274.

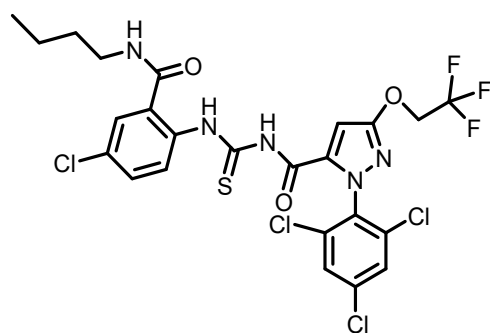

II-11

***N*-((2-(butylcarbamoyl)-4-chlorophenyl)carbamothioyl)-1-(2,4,6-trichlorophenyl)-3-(2,2,2-trifluoroethoxy)-1H-pyrazole-5-carboxamide(II-11, yield: 33%, melting point: 169-172 °C, white solid)**

**<sup>1</sup>H NMR** (400 MHz, DMSO-*d*<sub>6</sub>) δ 12.16 (s, 1H, -CONHCS-), 11.87 (s, 1H, -Ph-NHCS-), 8.48 (t, *J* = 5.3 Hz, 1H, -CONH-), 7.96 – 7.87 (m, 3H, Ph-H), 7.57 – 7.50 (m, 2H, Ph-H), 7.44 (s, 1H, Pyrazole-H), 4.91 (q, *J* = 8.8 Hz, 2H, -CH<sub>2</sub>CF<sub>3</sub>), 3.10 (q, *J* = 6.5 Hz, 2H, -CH<sub>2</sub>CH<sub>2</sub>CH<sub>2</sub>CH<sub>3</sub>), 1.40 (p, *J* = 6.8 Hz, 2H, -CH<sub>2</sub>CH<sub>2</sub>CH<sub>2</sub>CH<sub>3</sub>), 1.30 – 1.23 (m, 2H, -CH<sub>2</sub>CH<sub>2</sub>CH<sub>2</sub>CH<sub>3</sub>), 0.85 (t, *J* = 7.3 Hz, 3H, -CH<sub>2</sub>CH<sub>2</sub>CH<sub>2</sub>CH<sub>3</sub>).

<sup>13</sup>C NMR (101 MHz, DMSO) δ 179.7, 165.4, 161.8, 157.5, 136.8, 135.7, 135.6, 135.2, 134.8, 133.5, 131.0(t), 130.0, 129.6, 129.1, 128.0, 125.4, 122.6, 97.1, 65.9, 65.5, 39.1, 31.3, 20.0, 14.1.

<sup>19</sup>F NMR (376 MHz, DMSO-*d*<sub>6</sub>) δ -72.70 (t, *J* = 9.0 Hz).

HRMS (ESI) Calculated for C<sub>24</sub>H<sub>20</sub>Cl<sub>4</sub>F<sub>3</sub>N<sub>5</sub>O<sub>3</sub>S ([M + Na]<sup>+</sup>) = 677.9885, found 677.9880.

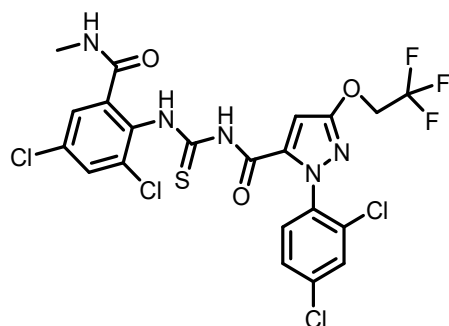

II-12

***N*-((2,4-dichloro-6-(methylcarbamoyl)phenyl)carbamothioyl)-1-(2,4-dichlorophenyl)-3-(2,2,2-trifluoroethoxy)-1H-pyrazole-5-carboxamide(II-12, yield: 31%, melting point: 127-130 °C, white solid)**

<sup>1</sup>H NMR (400 MHz, DMSO-*d*<sub>6</sub>) δ 12.00 (s, 1H, -CONHCS-), 11.57 (s, 1H, -Ph-NHCS-), 8.27 (d, *J* = 4.6 Hz, 1H, -CONH-), 7.87 (d, *J* = 2.1 Hz, 1H, Ph-H), 7.83 (d, *J* = 2.2 Hz, 1H, Ph-H), 7.67 (d, *J* = 8.5 Hz, 1H, Ph-H), 7.61 (dd, *J* = 8.5, 2.1 Hz, 1H, Ph-H), 7.50 (d, *J* = 2.2 Hz, 1H, Ph-H), 7.32 (s, 1H, Pyrazole-H), 4.90 (q, *J* = 8.8 Hz, 2H, -CH<sub>2</sub>CF<sub>3</sub>), 2.64 (d, *J* = 4.5 Hz, 3H, -NHCH<sub>3</sub>).

<sup>13</sup>C NMR (101 MHz, DMSO) δ 180.7, 164.9, 161.2, 158.5, 138.5, 137.4, 136.6, 134.9, 134.3, 133.2, 133.0, 132.3, 131.1(t), 129.8, 128.7, 127.6, 97.0, 65.9, 65.5, 40.6, 26.4.

<sup>19</sup>F NMR (376 MHz, DMSO-*d*<sub>6</sub>) δ -72.71 (t, *J* = 8.8 Hz).

HRMS (ESI) Calculated for C<sub>21</sub>H<sub>14</sub>Cl<sub>4</sub>F<sub>3</sub>N<sub>5</sub>O<sub>3</sub>S ([M + Na]<sup>+</sup>) = 635.9416, found 635.9410.

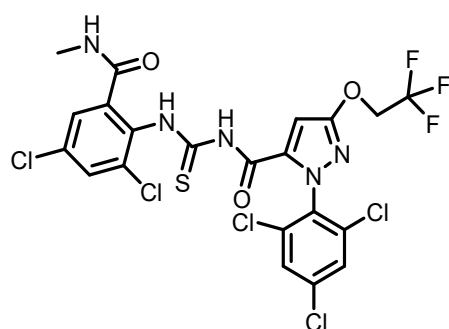

II-13

***N*-((2,4-dichloro-6-(methylcarbamoyl)phenyl)carbamothioyl)-1-(2,4,6-trichlorophenyl)-3-(2,2,2-trifluoroethoxy)-1H-pyrazole-5-carboxamide(II-13, yield: 31%, melting point: 148-159 °C, white solid)**

<sup>1</sup>H NMR (400 MHz, DMSO-*d*<sub>6</sub>) δ 13.68 (s, 2H, -CONHCS-), 10.42 (s, 1H, -Ph-NHCS-), 8.45 – 8.22 (m, 1H, -CONH-), 7.83 (d, *J* = 5.5 Hz, 3H, Ph-H), 7.48 (s, 1H, Ph-H), 6.98 (s, 1H, Pyrazole-H), 4.98 – 4.81 (m, 2H, -CH<sub>2</sub>CF<sub>3</sub>), 2.82 – 2.59 (m, 3H, -NHCH<sub>3</sub>).

**<sup>13</sup>C NMR** (101 MHz, DMSO)  $\delta$  172.4, 165.5, 161.8, 156.5, 138.8, 138.7, 135.8, 135.3, 135.0, 134.0, 132.5, 131.0(t), 128.7, 127.2, 94.8, 65.7, 65.4, 31.4, 26.5, 22.5, 14.4.

**<sup>19</sup>F NMR** (376 MHz, DMSO-*d*<sub>6</sub>)  $\delta$  -72.77 (t, *J* = 9.0 Hz).

**HRMS** (ESI) Calculated for C<sub>21</sub>H<sub>13</sub>Cl<sub>5</sub>F<sub>3</sub>N<sub>5</sub>O<sub>3</sub>S ([M + Na]<sup>+</sup>) = 669.9026, found 669.9024.

5.  $^1\text{H}$  NMR,  $^{13}\text{C}$  NMR, and  $^{19}\text{F}$  NMR spectrum of some title compounds I-1~17 and II-1~13

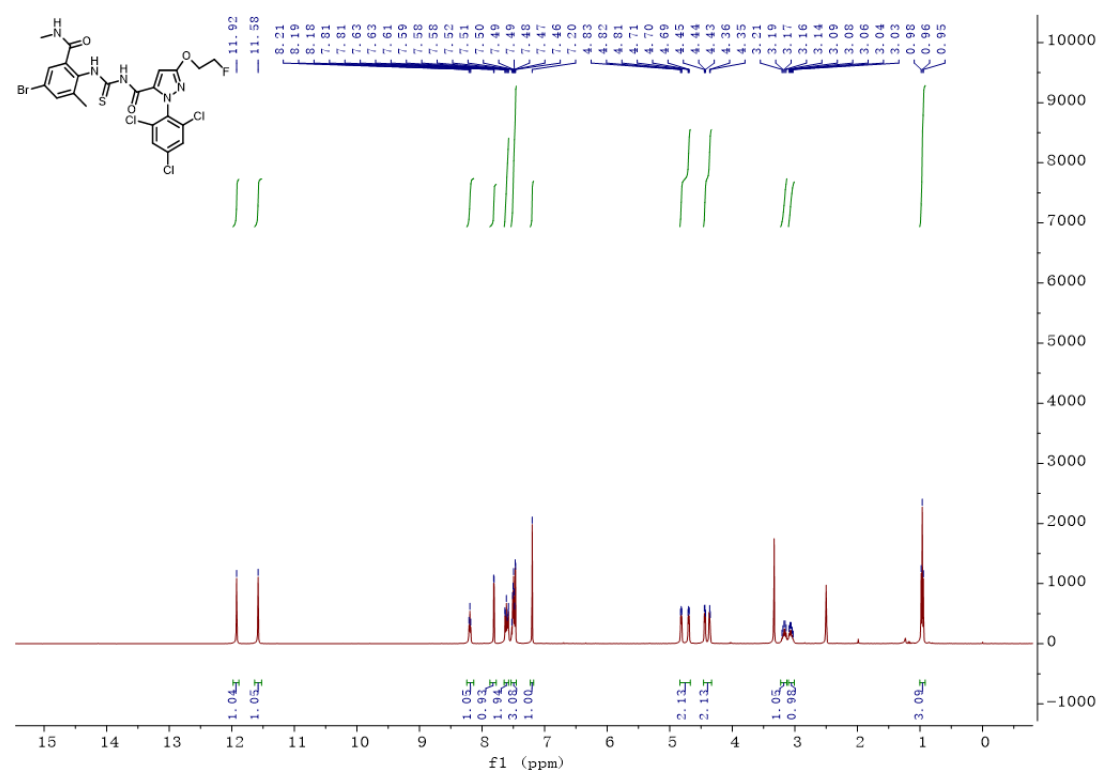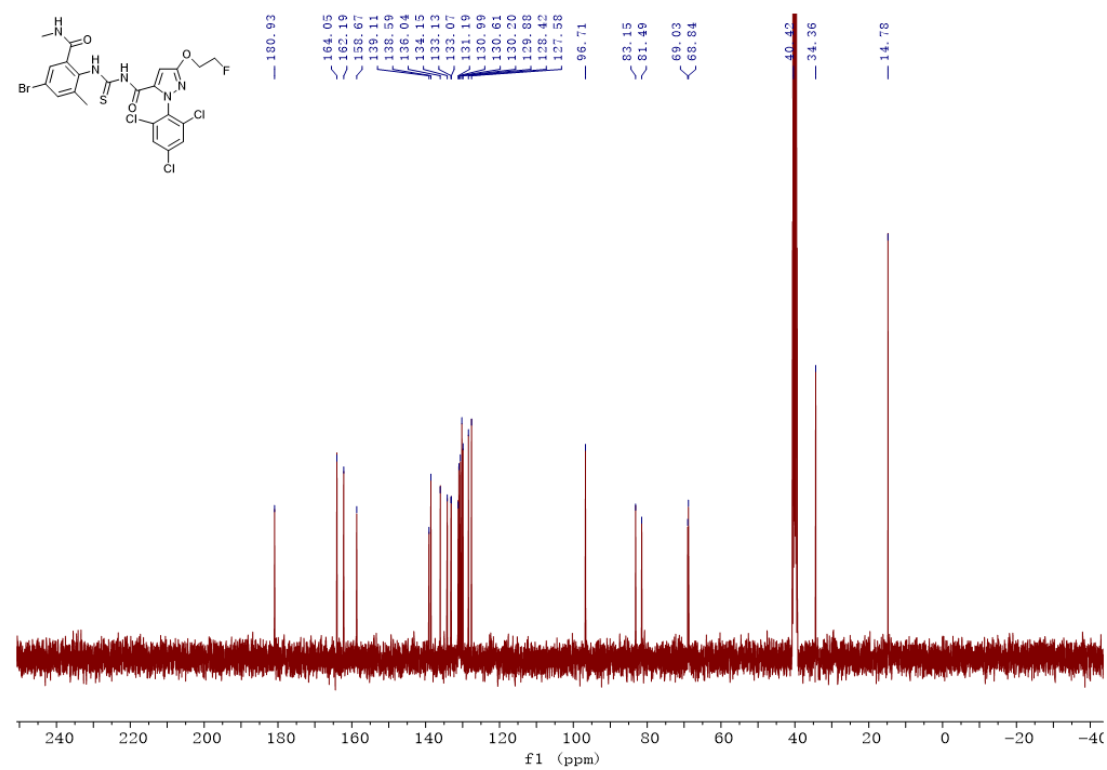

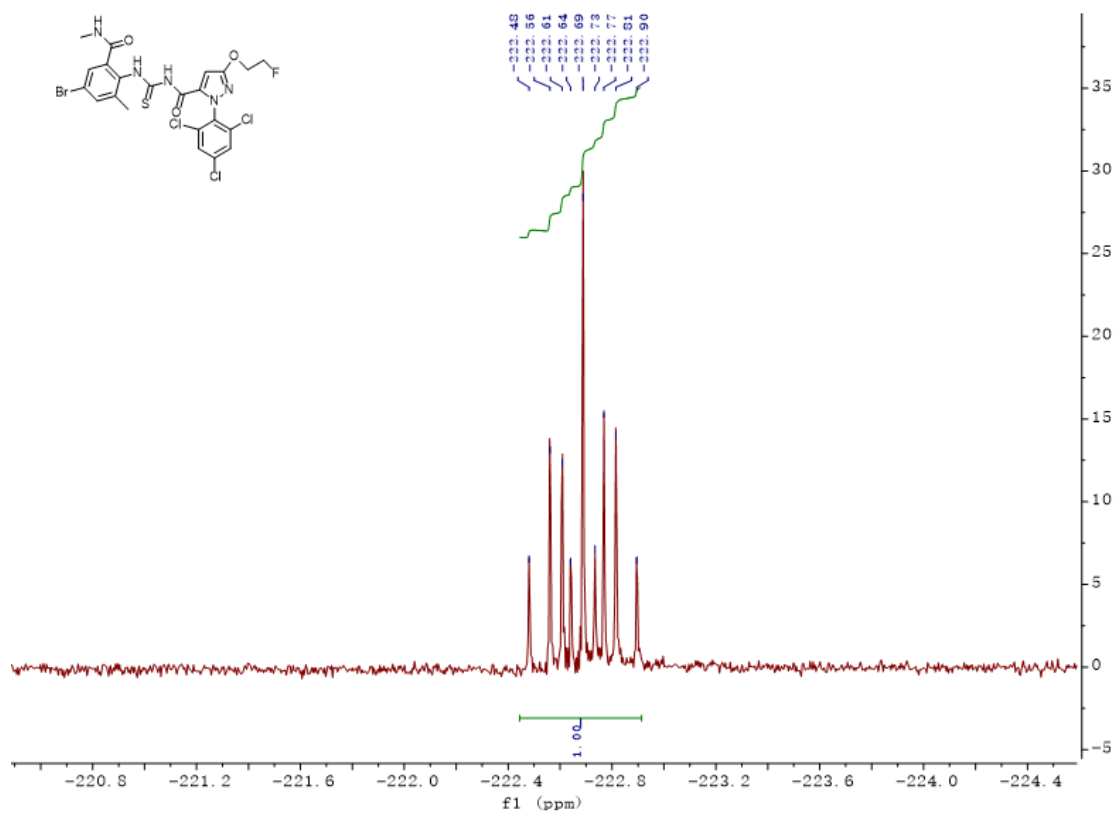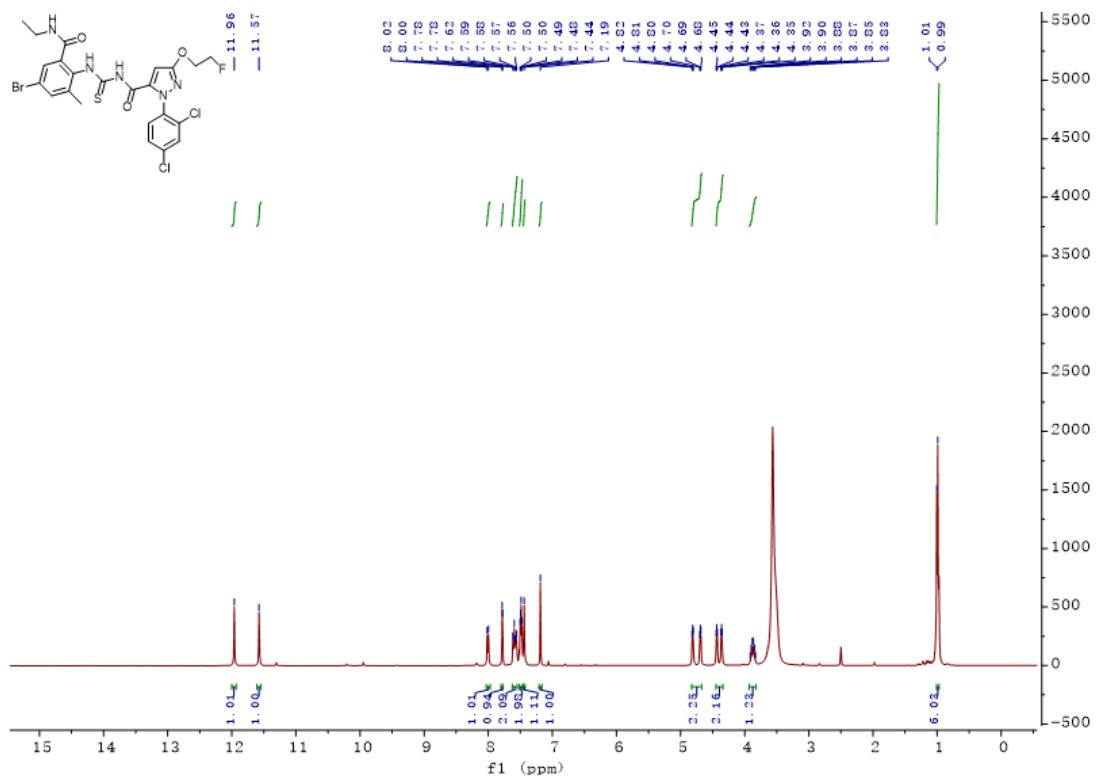



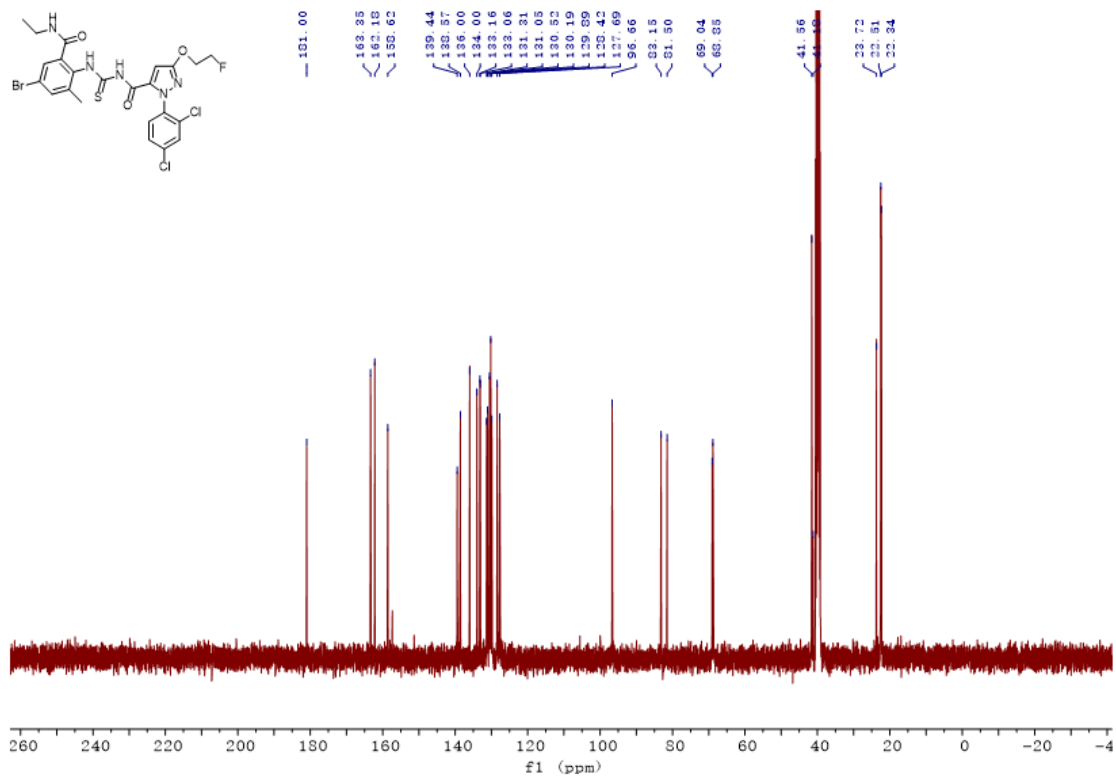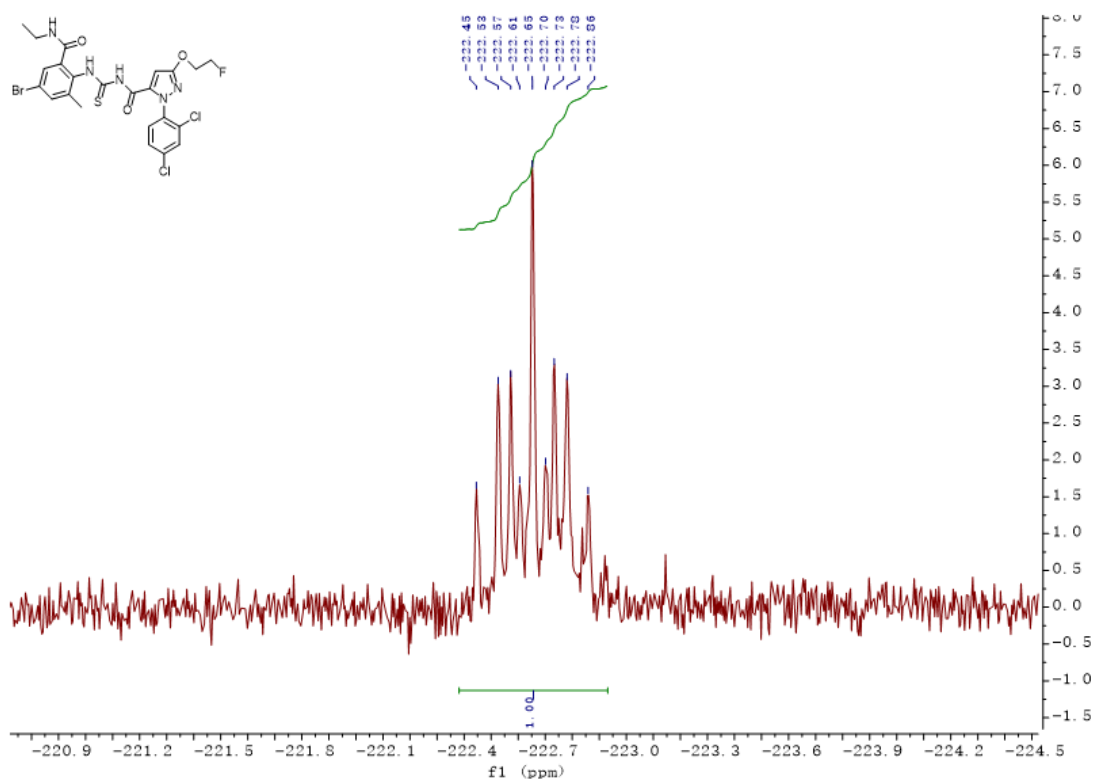

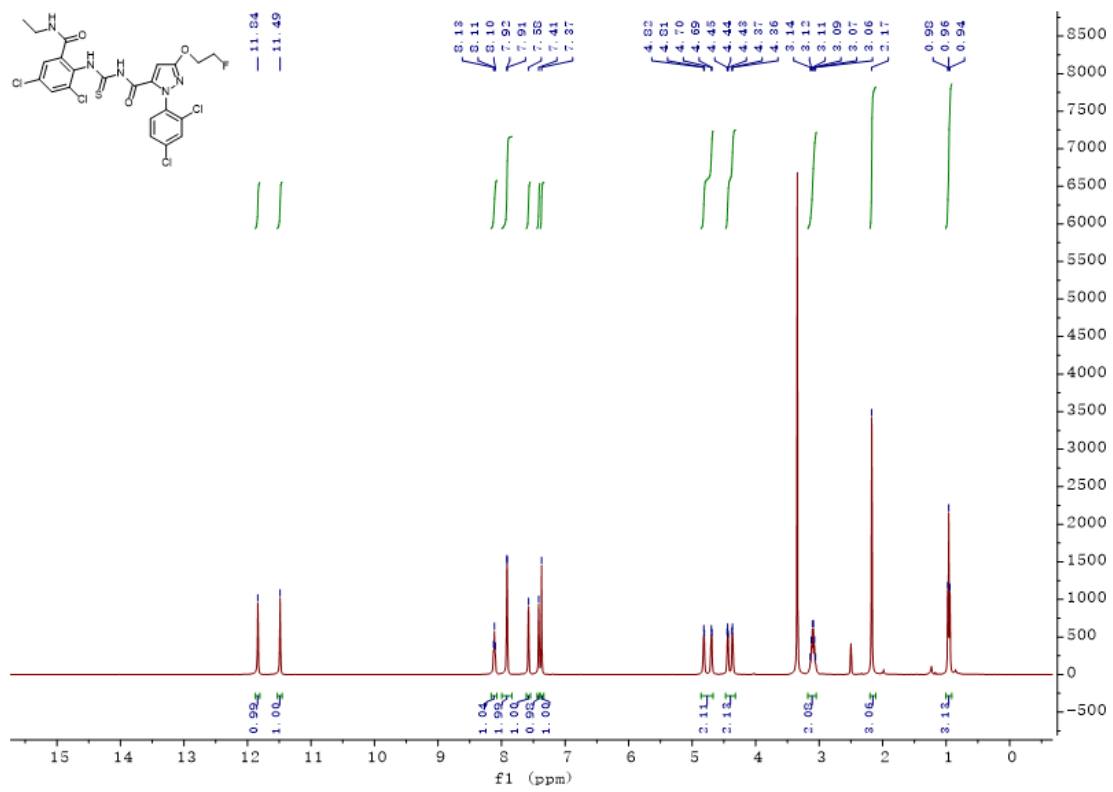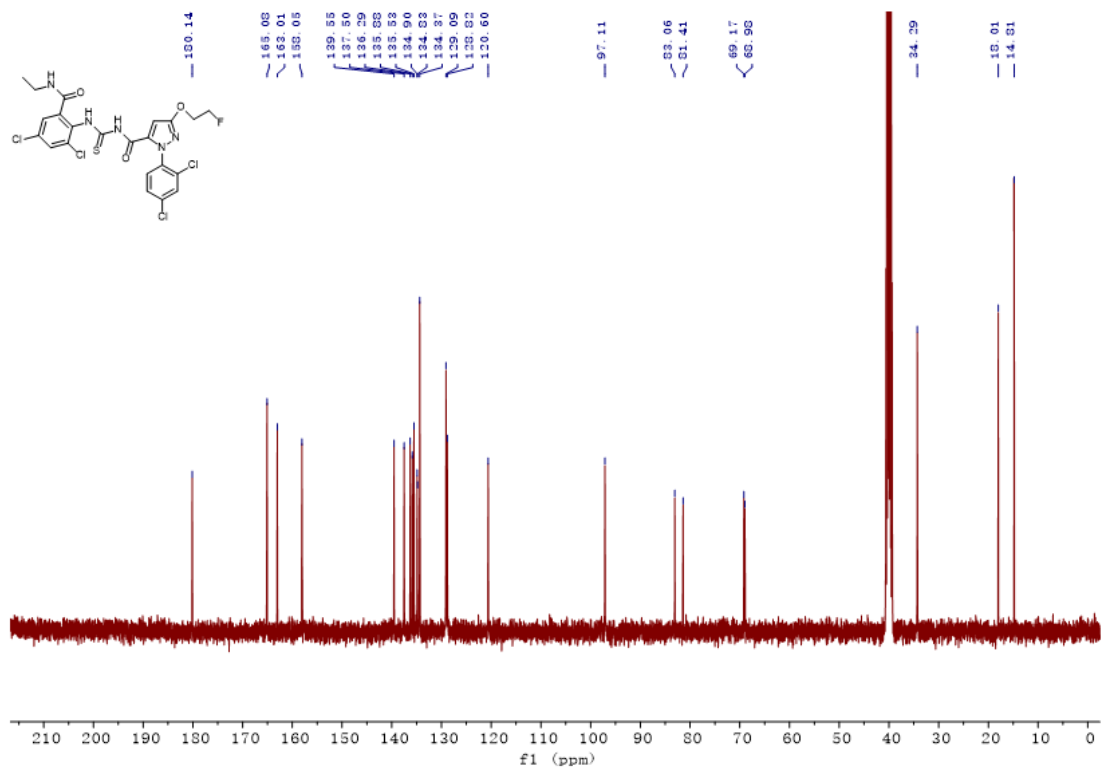

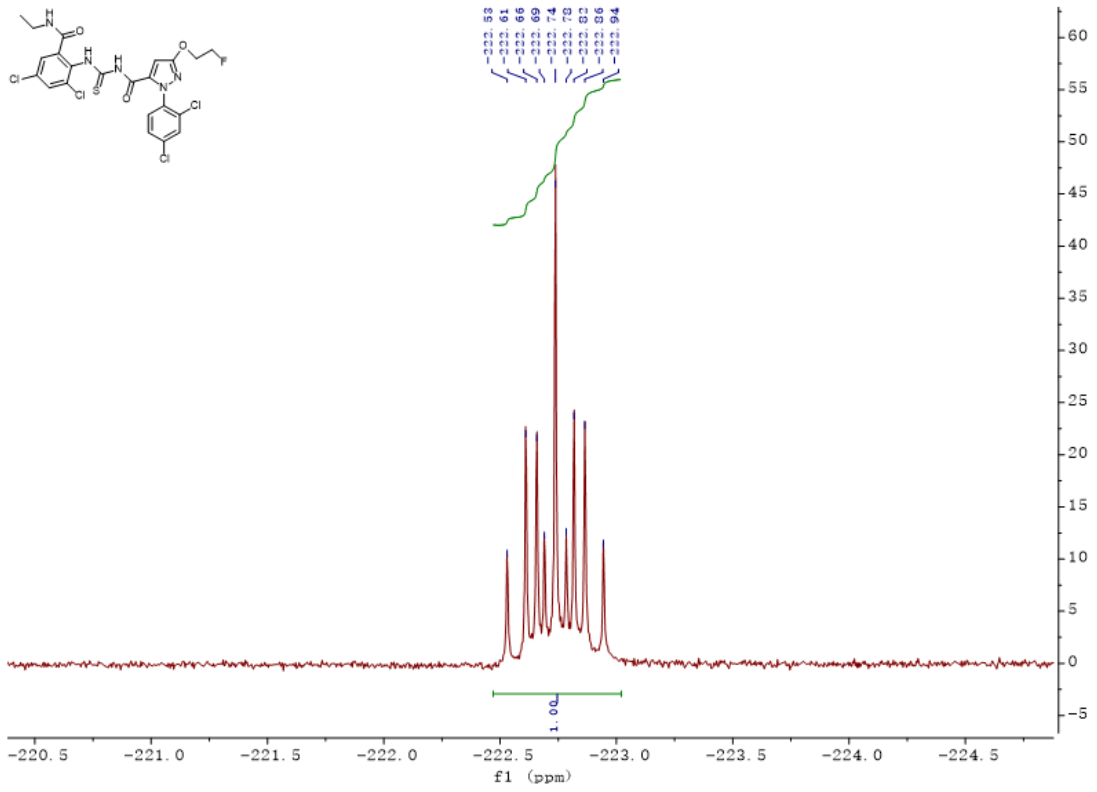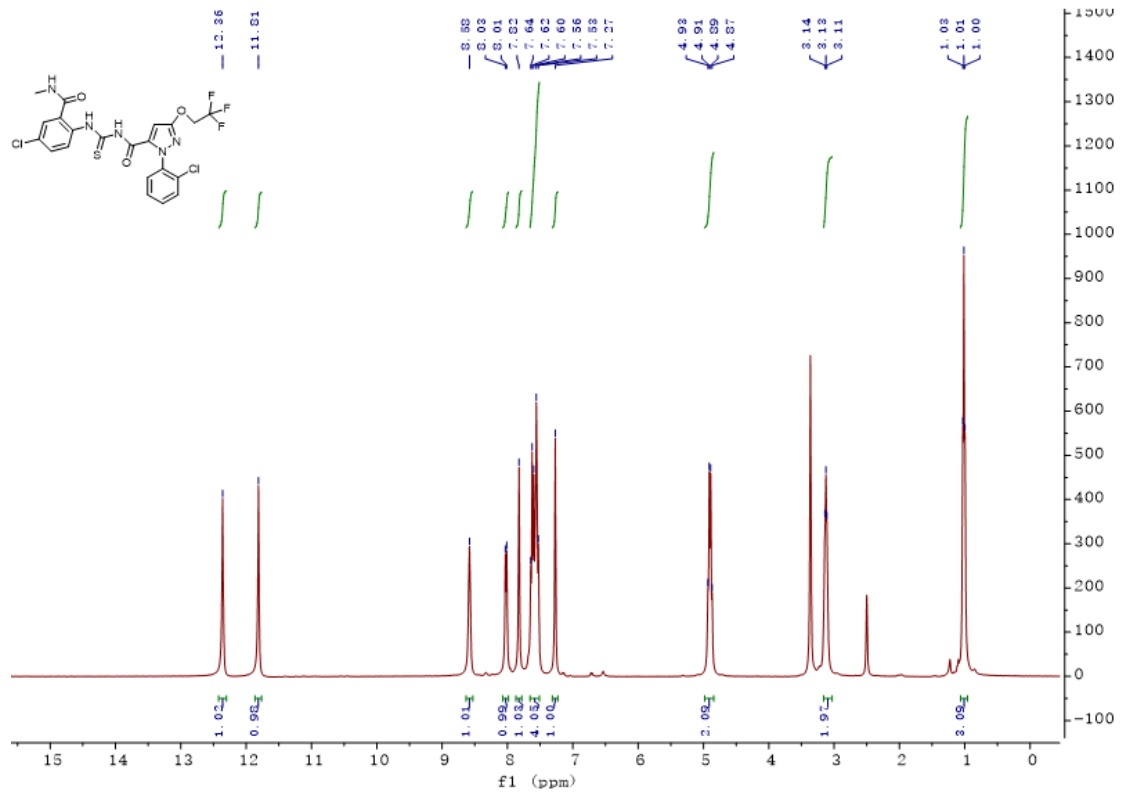

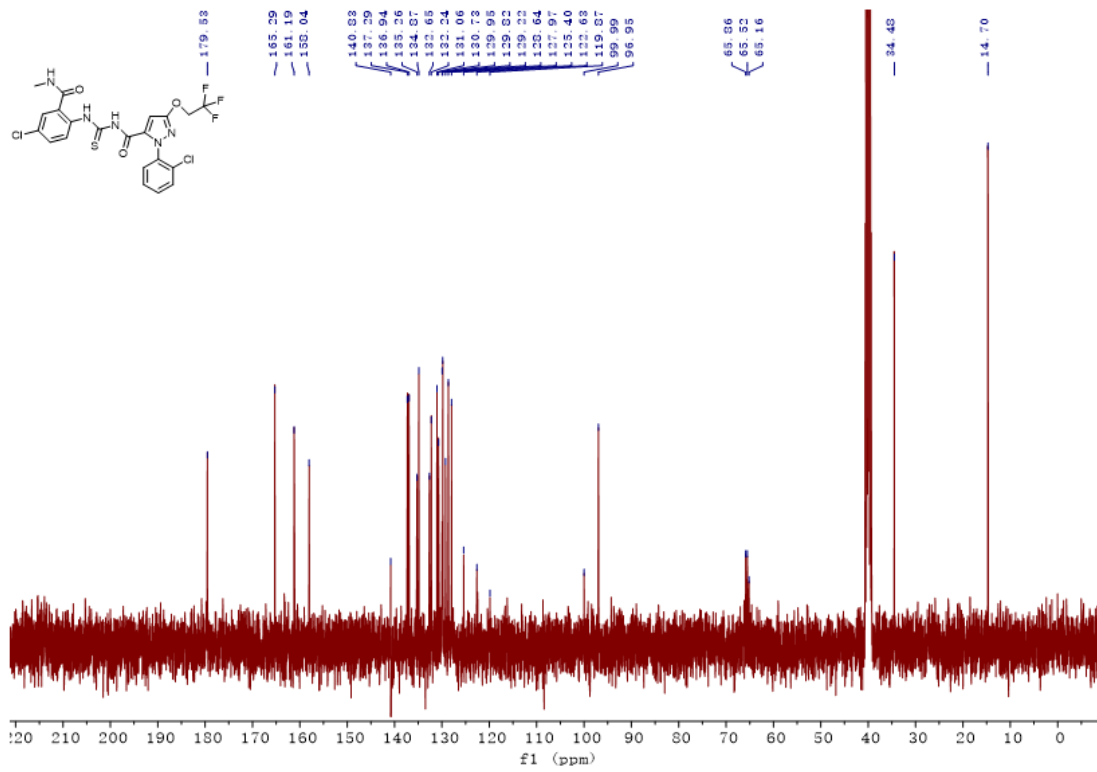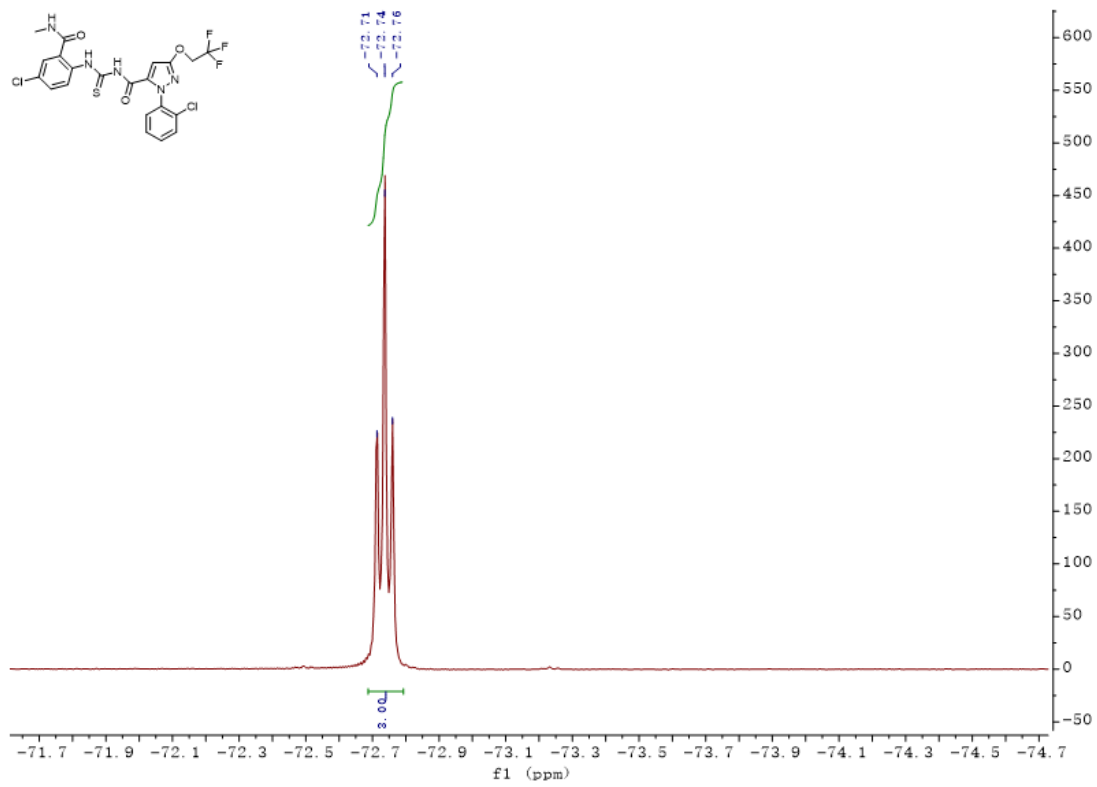

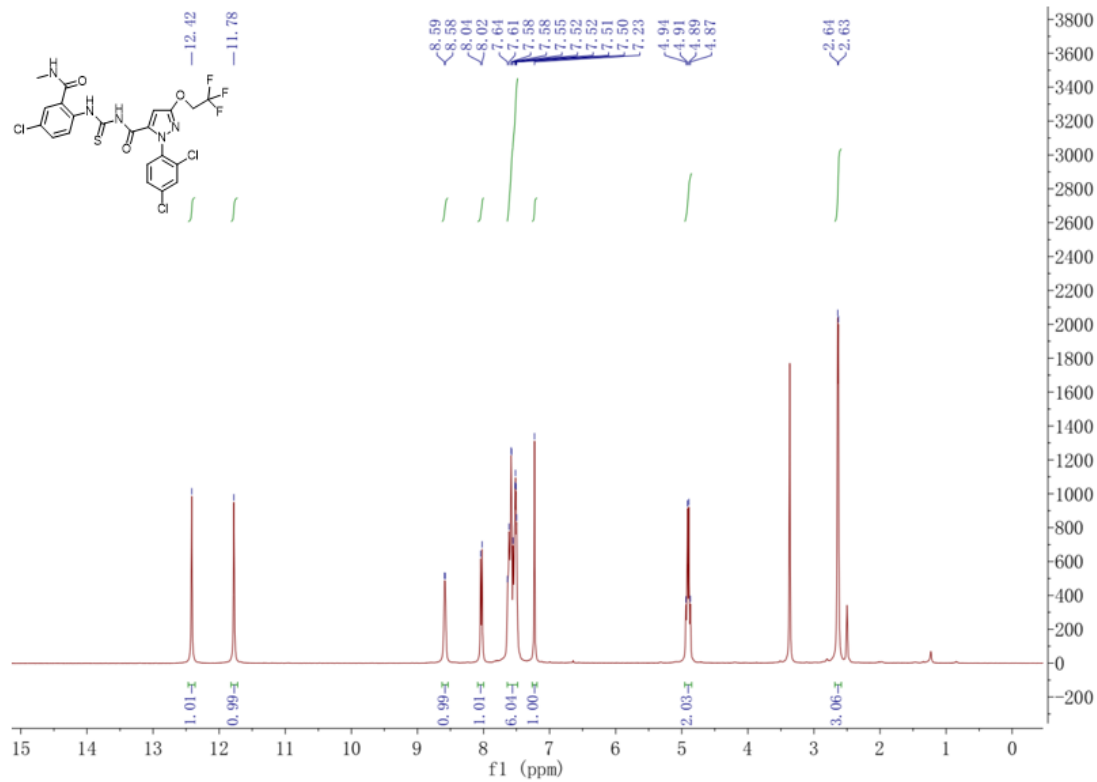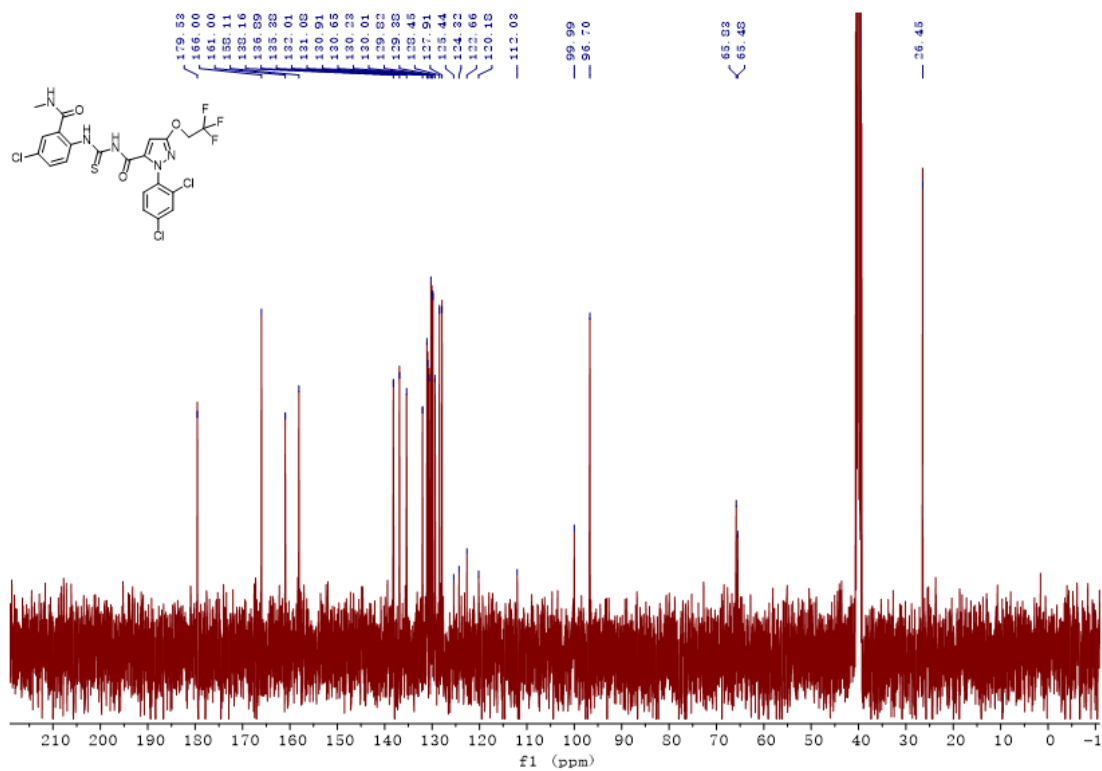

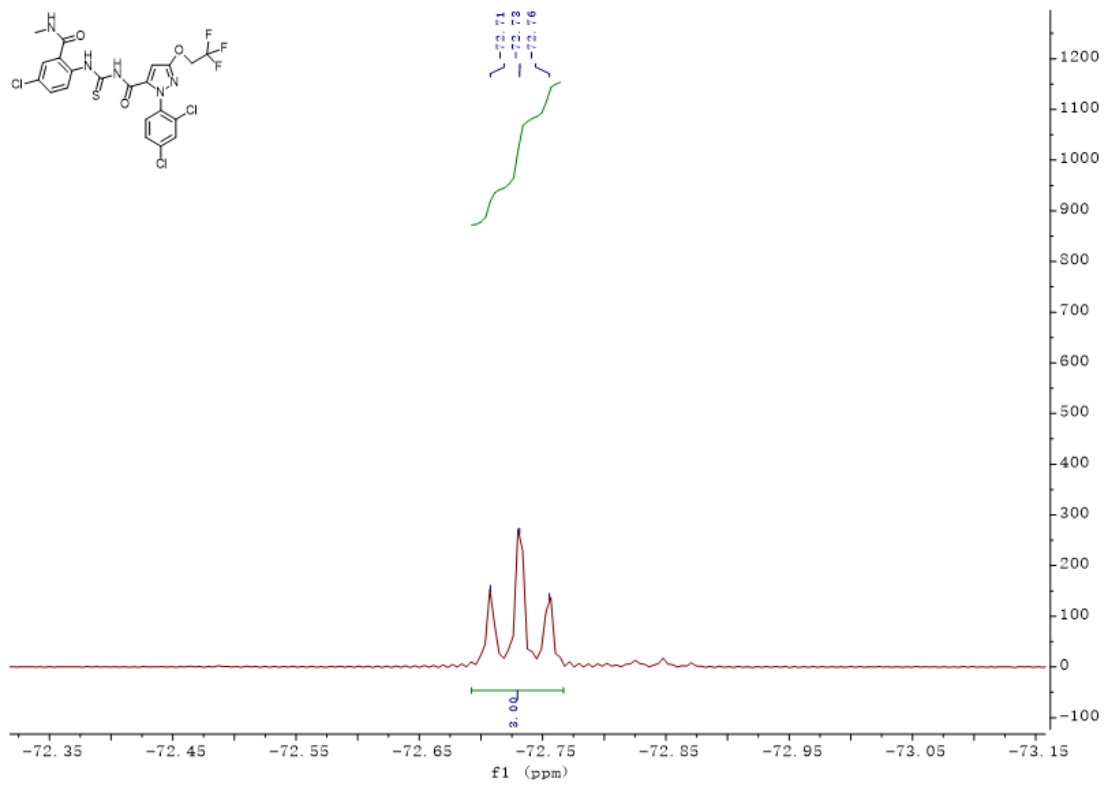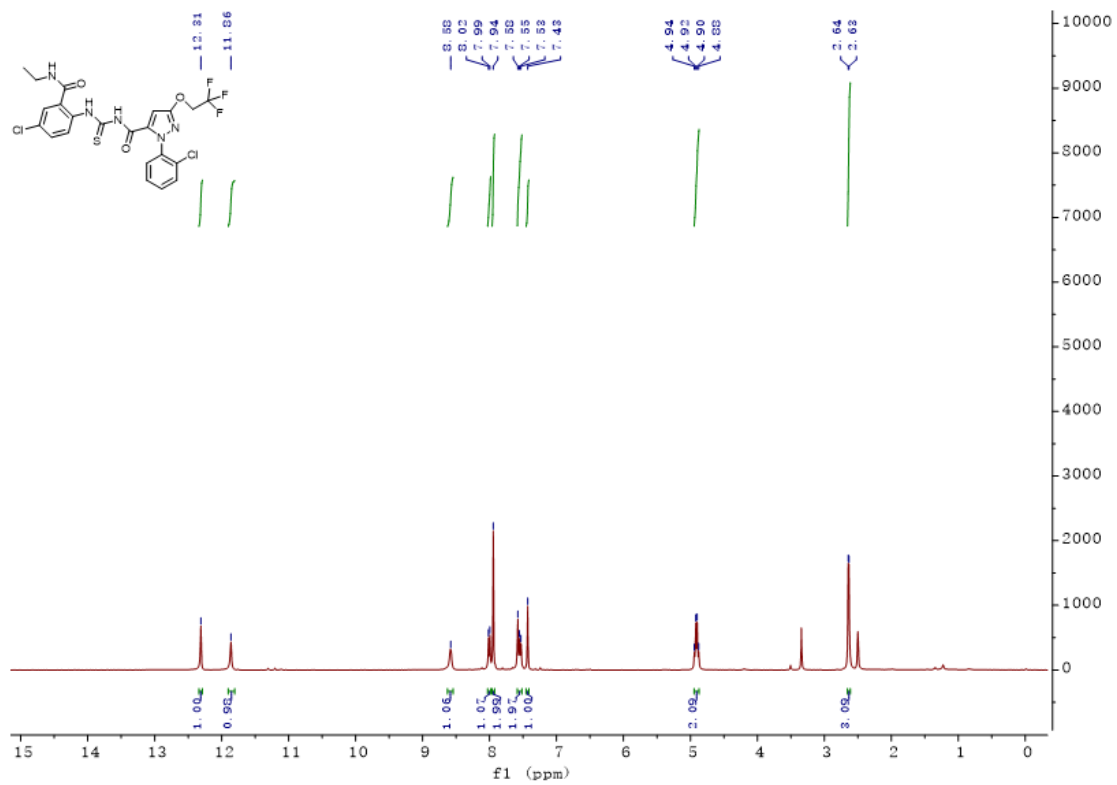

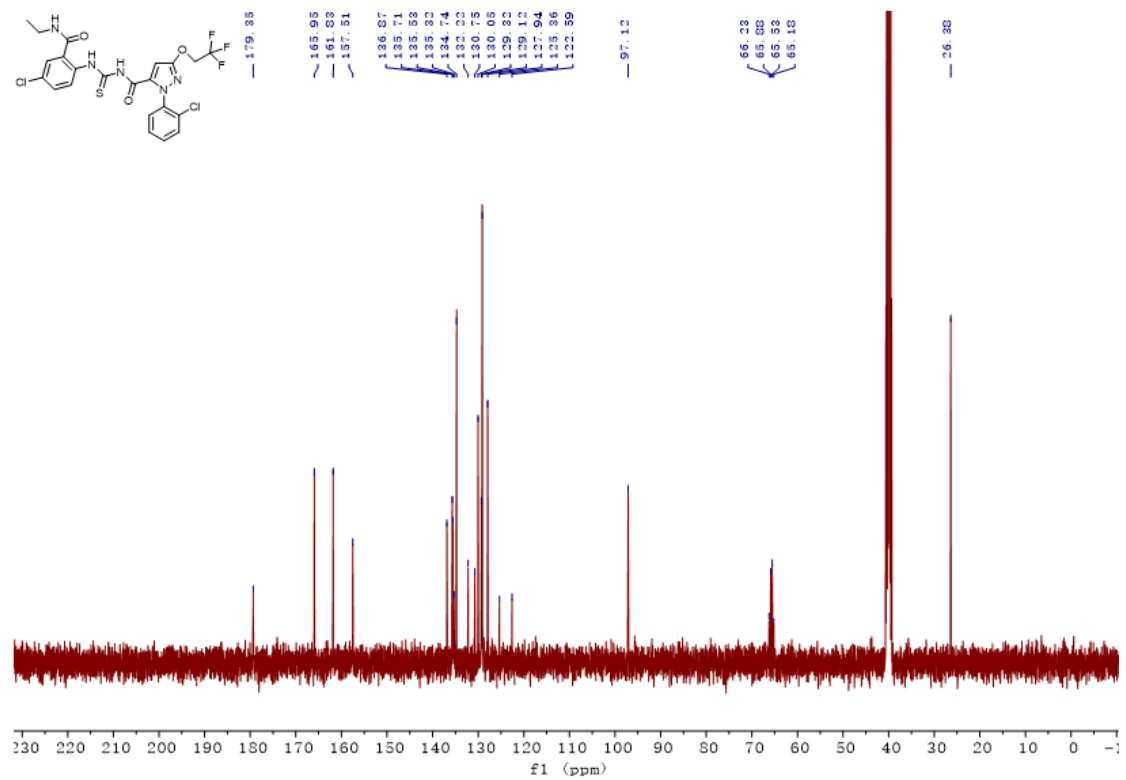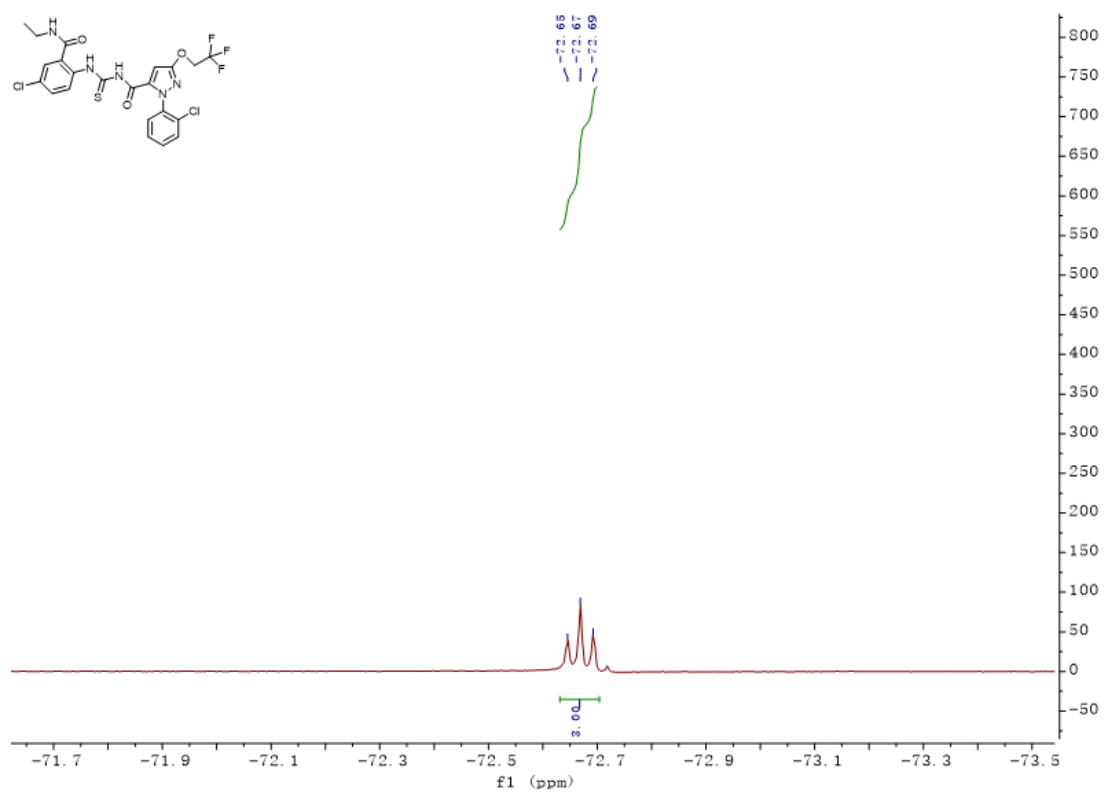

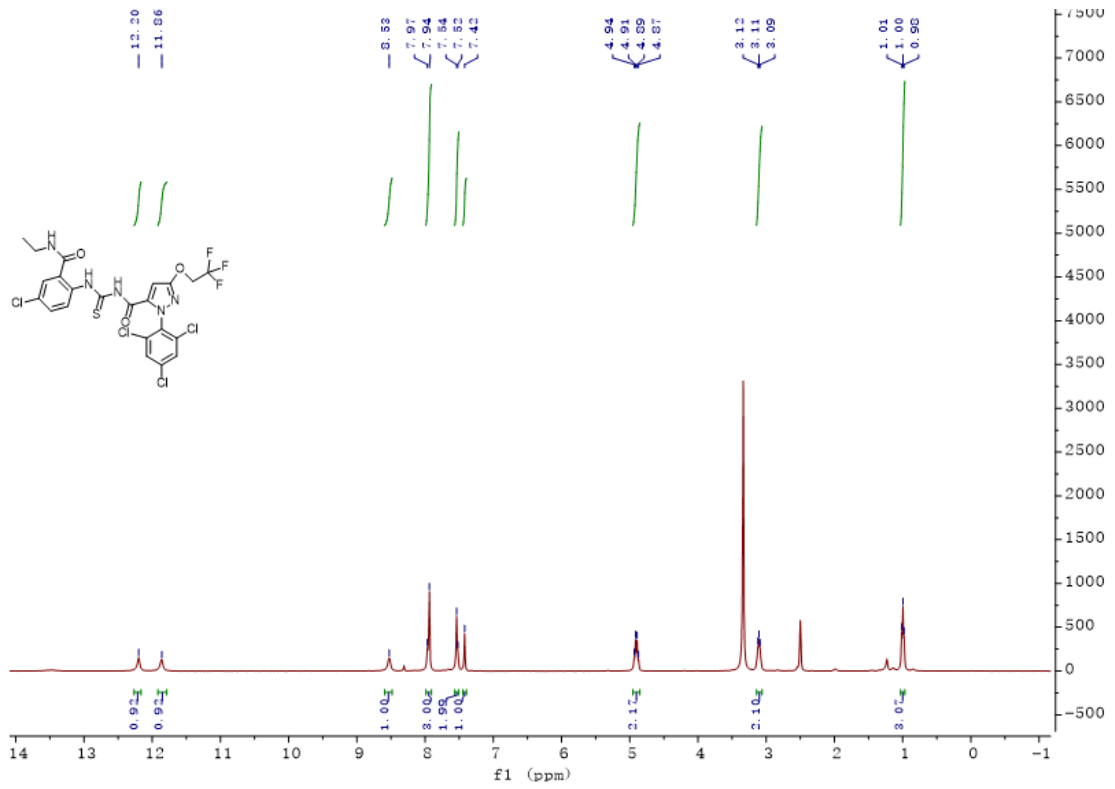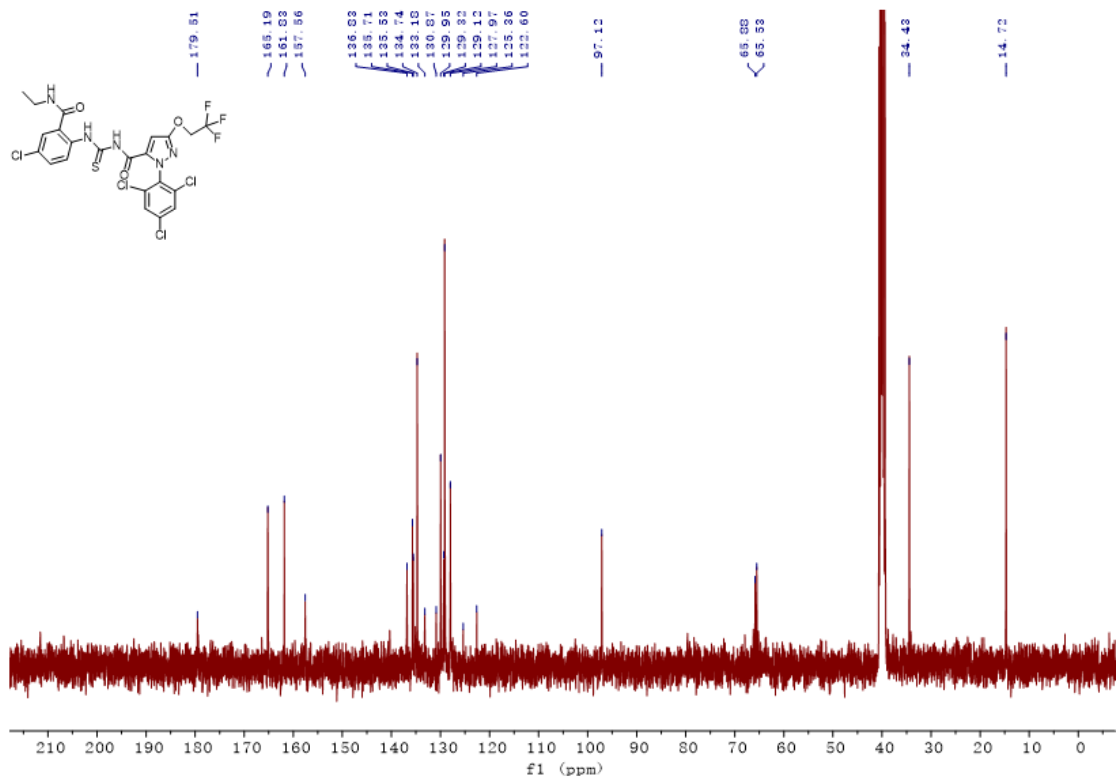



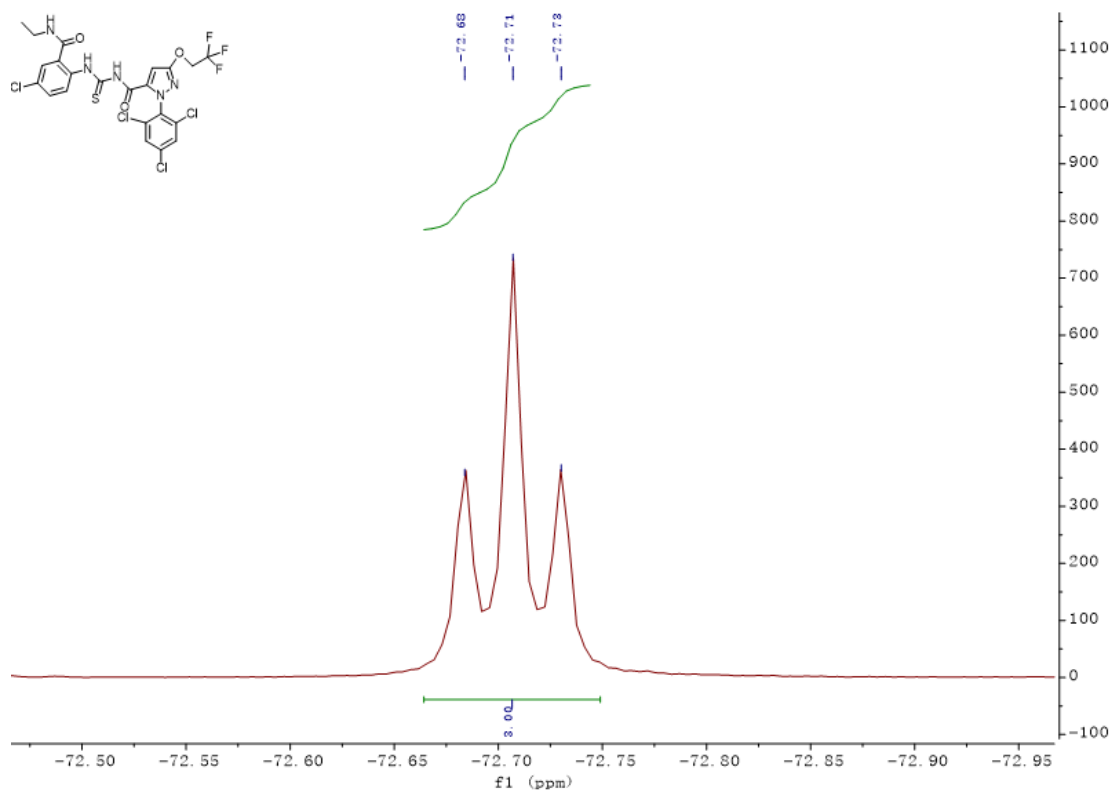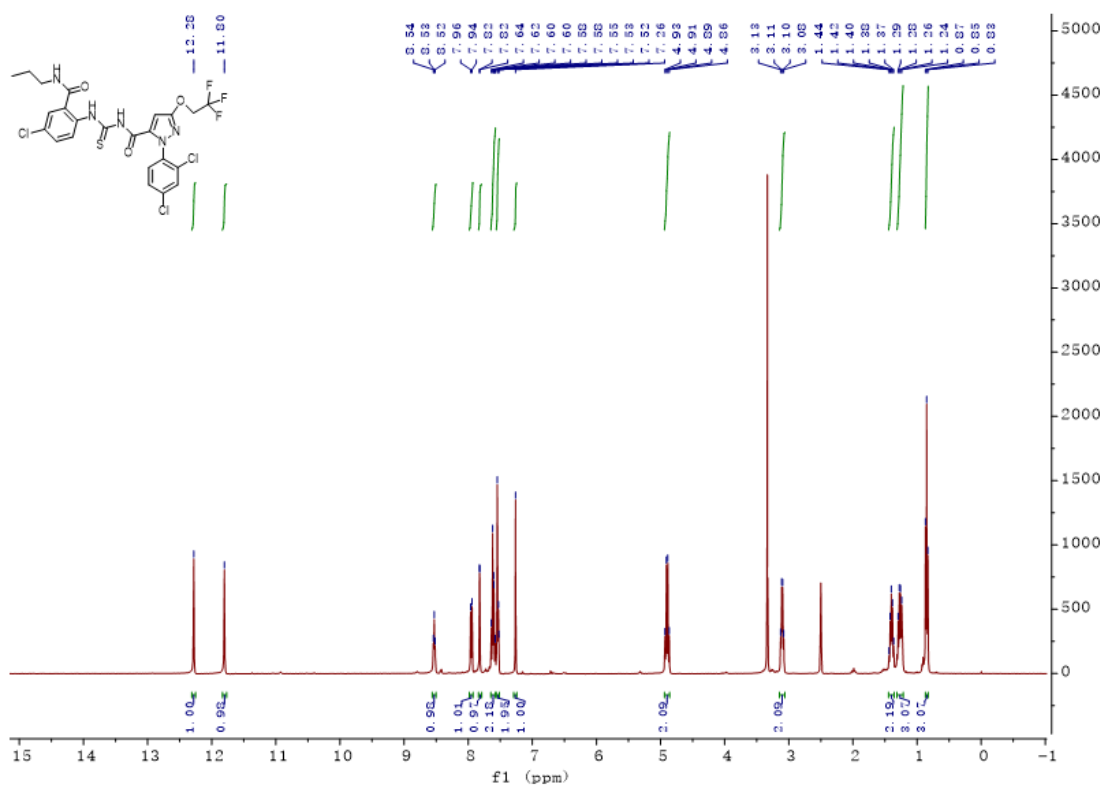

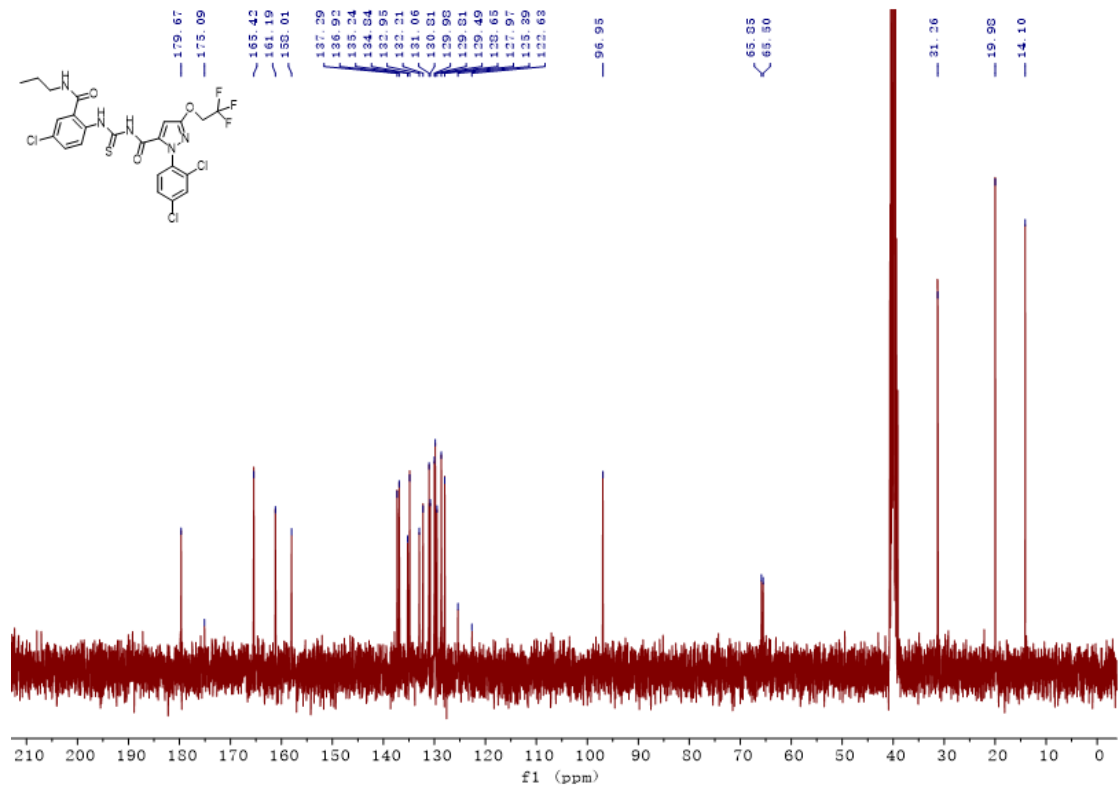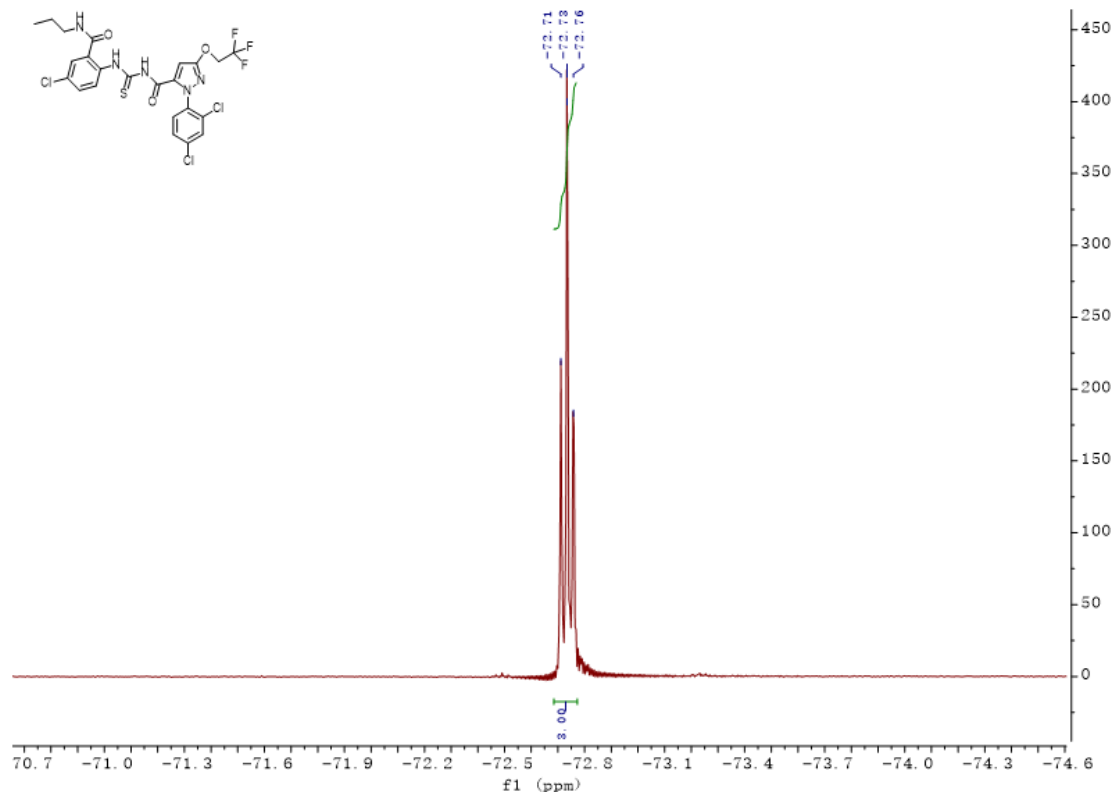

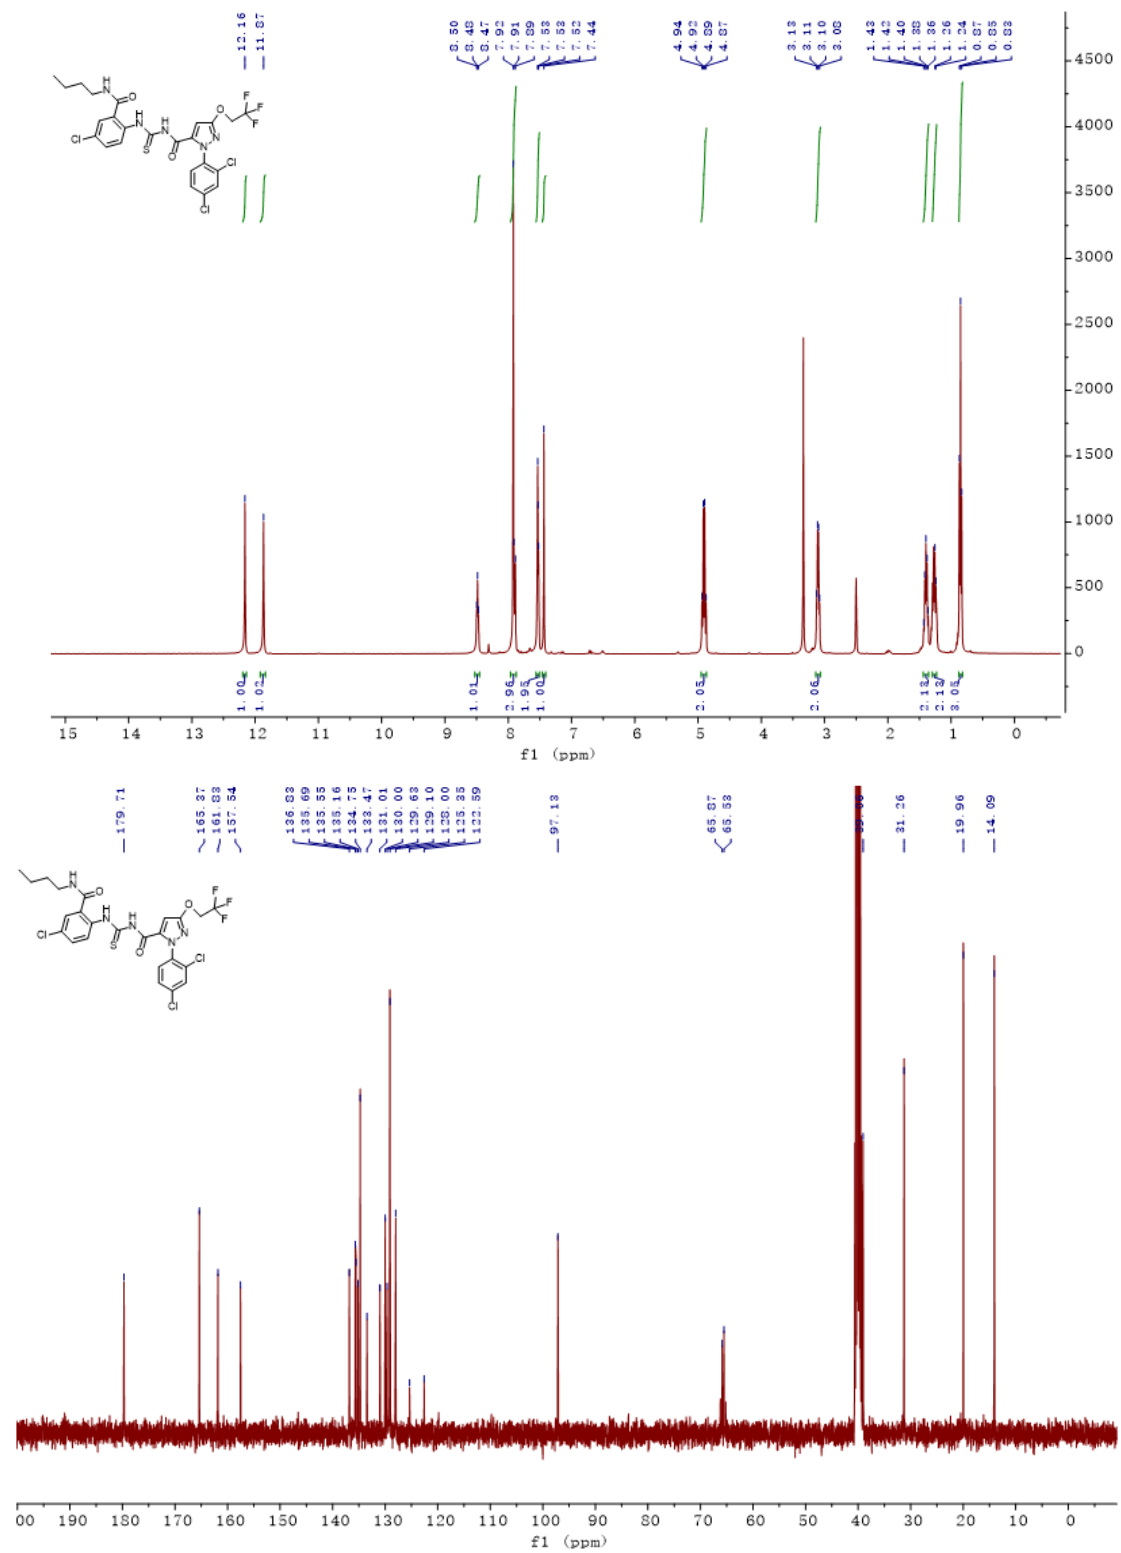

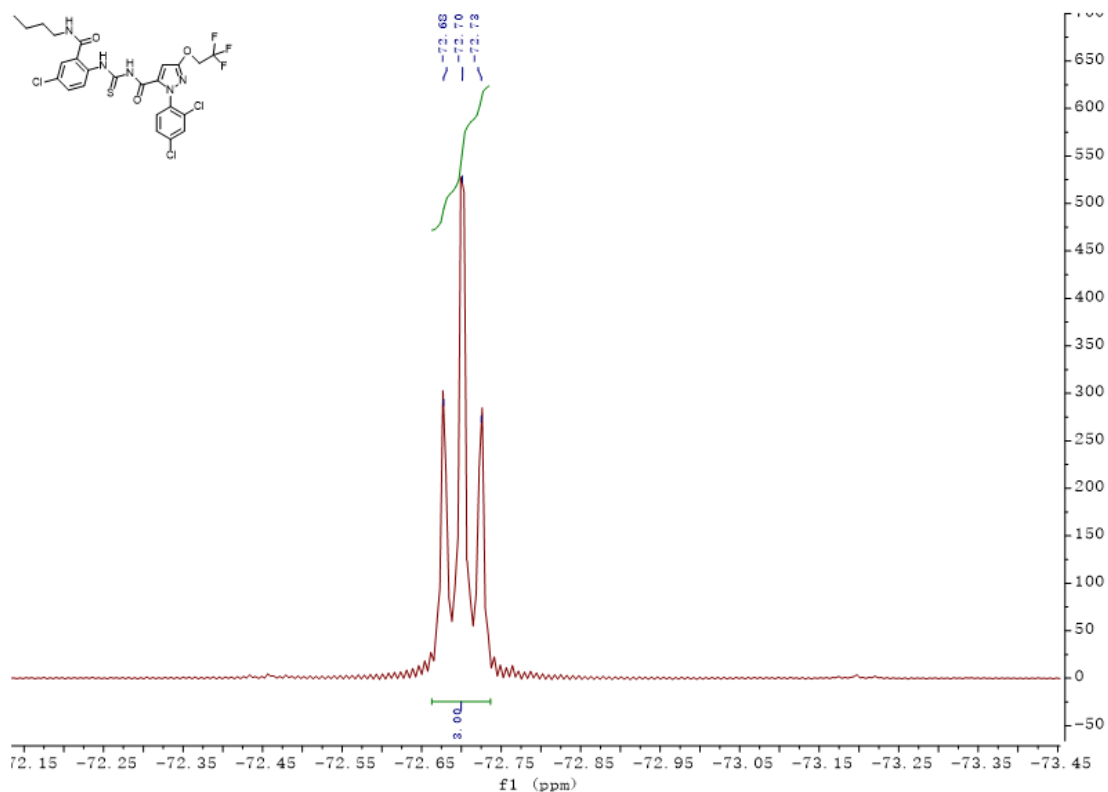

**6. The original data of the LC<sub>50</sub> value of CHL's insecticidal activity against *P. xylostella*.**

| Compd. | Insecticidal activities at a concentration of (mg/L) (%) |     |     |        |        |        |        |
|--------|----------------------------------------------------------|-----|-----|--------|--------|--------|--------|
|        | 50                                                       | 25  | 10  | 5      | 0.5    | 0.05   | 0.01   |
| I-14   | 100                                                      | 100 | 100 | 100    | 77 ± 5 | 50 ± 5 | 0      |
| I-15   | 100                                                      | 100 | 100 | 83 ± 5 | 60 ± 7 | 37 ± 5 | 0      |
| I-17   | 100                                                      | 100 | 100 | 90 ± 0 | 73 ± 6 | 40 ± 4 | 0      |
| CHL    | 100                                                      | 100 | 100 | 100    | 100    | 53 ± 3 | 13 ± 5 |
